# Supplementary material for: Network-Based Meta-Analyses of Associations of Multiple Gene Expression Profiles with Bone Mineral Density Variations in Women
Source: PubMed Central journal article supplement (PMC4726665; doi:10.1371/journal.pone.0147475), 2016-01-25

ESR1

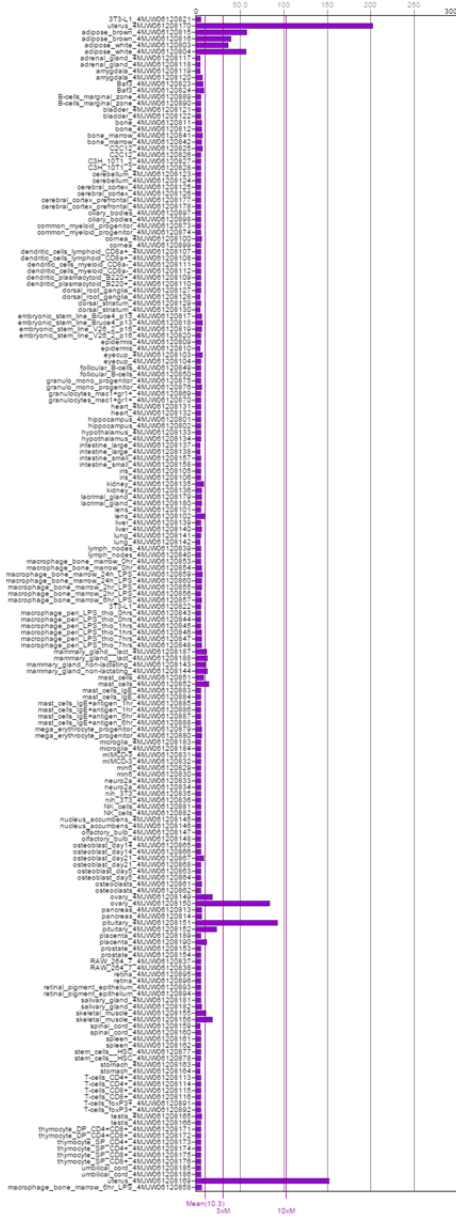

MAP3K3

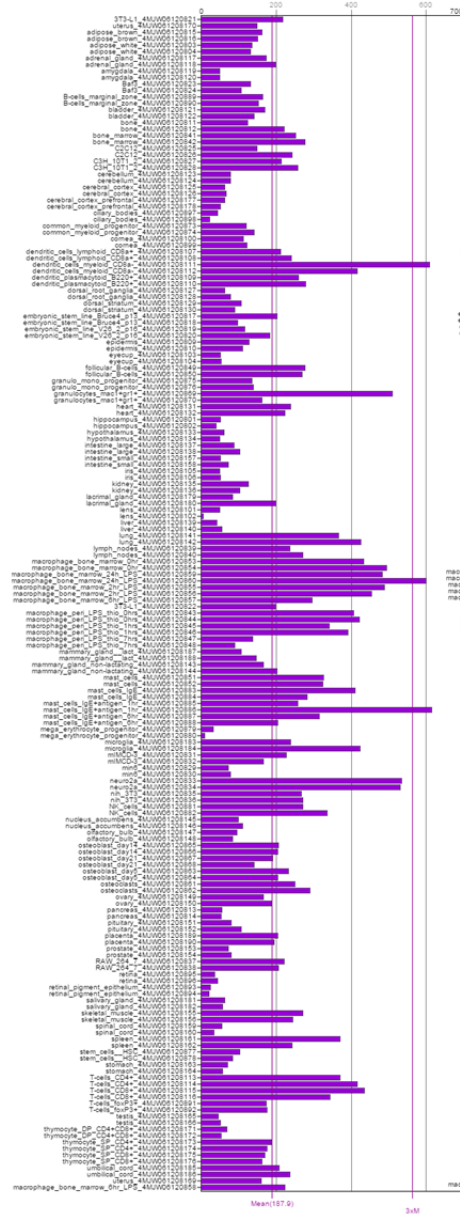

PYGM

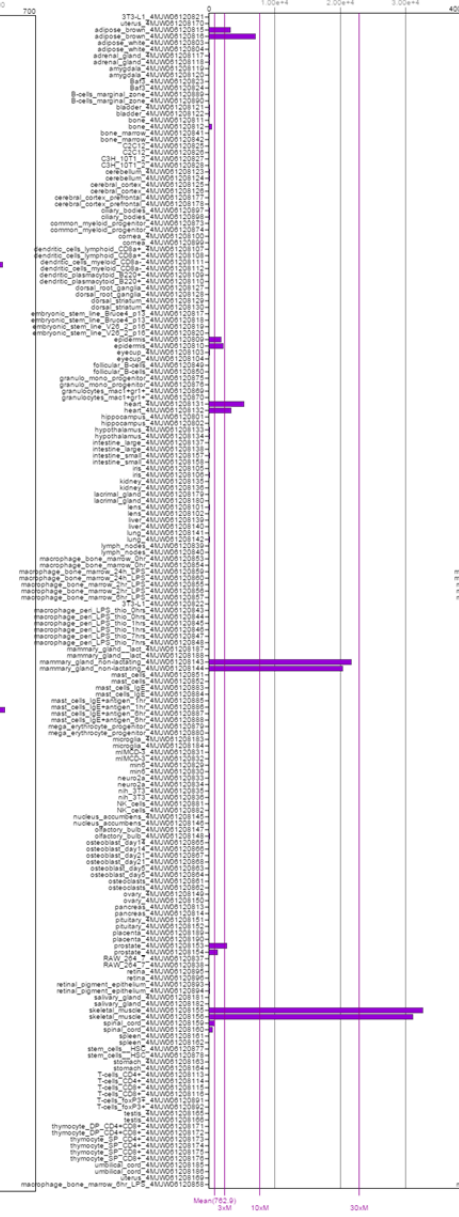

RAC1

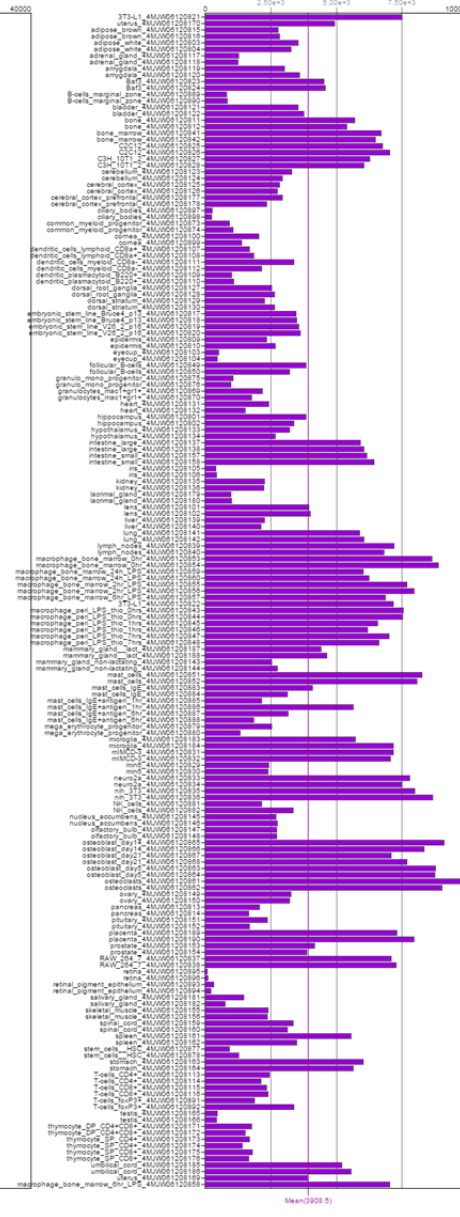

# SYK

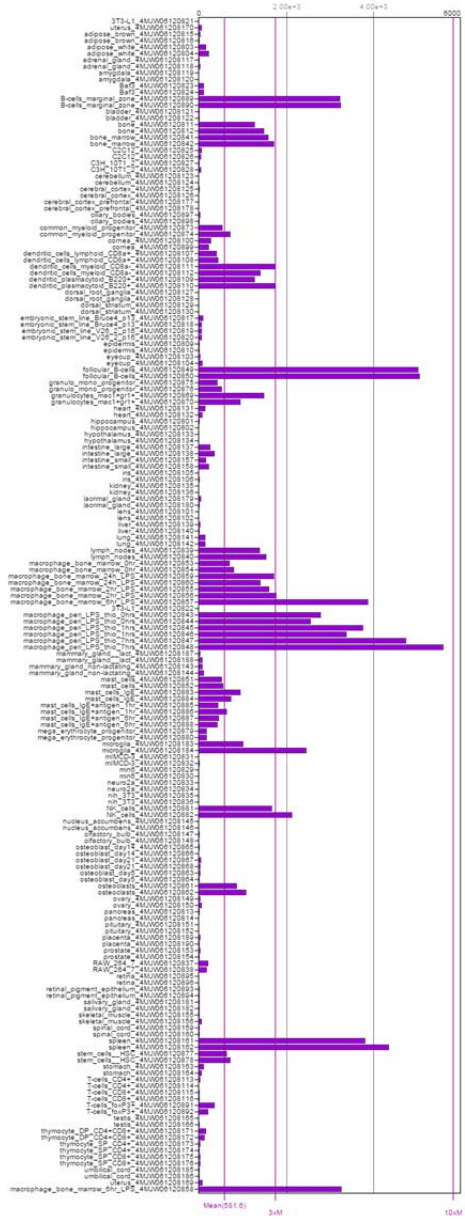

Supplement: pone.0147475.s002.pdf [file pone.0147475.s002.pdf]
