# Supplementary material for: Network-Based Meta-Analyses of Associations of Multiple Gene Expression Profiles with Bone Mineral Density Variations in Women
Source: PLoS One. 2016 Jan 25;11(1):e0147475. doi: 10.1371/journal.pone.0147475 (PMC4726665; doi:10.1371/journal.pone.0147475)
Supplement: S1 Table — (XLSX) [file pone.0147475.s003.xlsx]

## Sheet: S1 Table
S1 Table. Results of meta-analyisis using Fisher's methods.
Name	stat	pval	fdr
MARCH1	25.3285	0.0133406	0.0655339
MARCH2	19.6956	0.0730682	0.186865
MARCH3	17.644	0.126934	0.262405
MARCH5	13.6217	0.325513	0.478093
MARCH6	33.4229	0.000831271	0.01446
MARCH7	17.1897	0.142601	0.282913
MARCH8	22.2328	0.034992	0.116988
APRIL2	18.1814	0.110292	0.240444
SEPT2	15.4418	0.218159	0.371926
SEPT4	11.1362	0.517283	0.643173
SEPT6	12.122	0.435929	0.576814
SEPT7	20.4541	0.0589684	0.163533
SEPT8	25.8113	0.0114132	0.0595754
SEPT9	27.415	0.00673083	0.0437422
SEPT10	9.49986	0.659746	0.752457
SEPT11	19.3326	0.0808116	0.198087
SEPT15	25.7259	0.0117338	0.0608205
DEC1	8.98533	0.704183	0.783521
---	47.2689	4.18743e-06	0.00162723
15E1.2	13.2217	0.353131	0.503363
2'-PDE	20.7398	0.0543227	0.154808
3.8-1	23.1057	0.0268419	0.0995603
76P	20.6368	0.0559592	0.157891
A2BP1	21.0452	0.0497221	0.146963
A2M	6.66152	0.879148	0.910824
A4GALT	16.4309	0.172286	0.319433
A4GNT	10.1333	0.604267	0.710686
AAAS	27.7903	0.00593629	0.0405154
AACS	16.0509	0.188917	0.338789
AADAC	33.5981	0.000780297	0.0139741
AAK1	22.502	0.0322636	0.111241
AAMP	12.6465	0.395246	0.542193
AANAT	18.9738	0.089162	0.210858
AARS	14.0364	0.298388	0.45415
AARSD1	22.6061	0.0312627	0.109397
AASDHPPT	22.2073	0.0352611	0.117525
AASS	11.4027	0.494757	0.624563
AATF	15.8644	0.197526	0.34929
AATK	5.31848	0.946487	0.960823
ABAT	29.1205	0.00378086	0.0315869
ABC1	22.5334	0.0319591	0.110666
ABCA1	26.104	0.0103761	0.0565611
ABCA11	13.4962	0.334031	0.48595
ABCA12	7.2841	0.838282	0.881839
ABCA2	17.6496	0.126753	0.262151
ABCA3	17.5556	0.129866	0.26595
ABCA4	12.2048	0.429378	0.571447
ABCA5	25.0158	0.0147482	0.0693299
ABCA6	20.5232	0.0578132	0.161378
ABCA7	18.5541	0.0998735	0.225773
ABCA8	18.6749	0.0966823	0.221031
ABCB1	14.0518	0.297412	0.453287
ABCB1 /// ABCB4	25.16	0.0140827	0.0678308
ABCB11	5.77514	0.92699	0.945089
ABCB4	12.4006	0.414066	0.558687
ABCB6	14.7251	0.256816	0.412327
ABCB6 /// ATG9A	19.4281	0.0787071	0.19497
ABCB7	27.1529	0.00734476	0.0458918
ABCB8	26.5765	0.0088873	0.0515093
ABCB9	15.4883	0.215812	0.369634
ABCC1	21.8021	0.0397981	0.127061
ABCC10	30.6391	0.00223547	0.0238034
ABCC2	27.8017	0.0059135	0.040502
ABCC3	3.95924	0.984161	0.987863
ABCC4	14.9124	0.246264	0.401669
ABCC5	24.1207	0.0195853	0.0816841
ABCC6	13.4542	0.336908	0.488643
ABCC8	22.5853	0.03146	0.109874
ABCC9	34.9876	0.000470437	0.010803
ABCD1	19.2555	0.0825469	0.200604
ABCD1 /// LOC642762 /// LOC648897 /// LOC649268 /// LOC651123	19.3766	0.079837	0.196556
ABCD2	15.9495	0.193561	0.344103
ABCD3	31.2636	0.00179559	0.0214667
ABCD4	35.628	0.000371724	0.00987957
ABCE1	28.6601	0.00442421	0.0346814
ABCF1	18.2456	0.108434	0.23787
ABCF2	15.0361	0.239466	0.39457
ABCF3	13.8323	0.311544	0.465481
ABCG1	25.2176	0.0138249	0.0670005
ABCG2	14.324	0.280499	0.436231
ABCG4	13.0022	0.368882	0.517697
ABCG5	19.6381	0.07425	0.188622
ABHD10	21.2245	0.047188	0.141929
ABHD11	16.6164	0.164607	0.310195
ABHD14A	16.2973	0.177994	0.326478
ABHD2	11.8063	0.46136	0.596344
ABHD3	28.7754	0.00425384	0.0339694
ABHD4	16.1975	0.182355	0.331221
ABHD5	33.4255	0.000830487	0.01446
ABHD6	20.9339	0.0513568	0.149762
ABHD8	25.5156	0.0125601	0.063141
ABHD9	20.8751	0.0522393	0.151155
ABI1	25.2098	0.0138596	0.0670764
ABI2	9.19661	0.686052	0.770156
ABI3BP	13.0494	0.365459	0.514399
ABL1	17.5792	0.129078	0.265151
ABL2	11.5775	0.480183	0.611991
ABLIM1	11.5315	0.483998	0.615235
ABLIM2	14.3232	0.280546	0.436253
ABLIM3	11.2452	0.508029	0.63537
ABO	28.6083	0.0045028	0.0348875
ABP1	10.9503	0.533185	0.655948
ABR	15.3396	0.223386	0.377776
ABT1	26.1385	0.0102597	0.0562256
ABTB2	7.50116	0.822799	0.871183
ACAA1	10.8998	0.537526	0.659336
ACAA2	18.5246	0.100665	0.226946
ACACA	20.3381	0.0609541	0.166723
ACACB	26.909	0.00796369	0.0480994
ACAD10	18.3139	0.106487	0.235435
ACAD8	15.7168	0.204555	0.357736
ACADL	9.71363	0.641067	0.739441
ACADM	26.4858	0.00915653	0.052387
ACADS	15.0401	0.23925	0.394472
ACADSB	20.4522	0.059001	0.163555
ACADVL	8.85855	0.714962	0.792475
ACAT1	28.1544	0.00525133	0.0376279
ACAT2	18.8917	0.0911759	0.213716
ACBD3	18.2336	0.108781	0.238433
ACBD4	11.8794	0.455415	0.592622
ACCN1	17.0804	0.146597	0.287887
ACCN2	9.96474	0.619054	0.72161
ACCN3	13.7207	0.318896	0.472375
ACCN4	11.2079	0.51119	0.637953
ACD	9.25155	0.681307	0.767283
ACE	4.22685	0.978986	0.983927
ACE2	14.0645	0.296606	0.452368
ACF	16.4171	0.172871	0.320162
ACHE	15.9961	0.191415	0.34139
ACIN1	28.6785	0.00439658	0.0345517
ACLY	11.7688	0.46442	0.59908
ACN9	23.2632	0.025573	0.0962468
ACO1	12.1389	0.434588	0.575911
ACO2	16.0724	0.187941	0.337758
ACOT11	4.74225	0.966039	0.973702
ACOT2 /// ACOT1 /// LOC653878	9.83765	0.630201	0.730064
ACOT7	6.0607	0.912991	0.934783
ACOT8	8.36585	0.755927	0.82234
ACOT9	8.56425	0.739629	0.811007
ACOX1	13.2821	0.348873	0.499529
ACOX2	18.6998	0.0960341	0.220369
ACOX3	9.39233	0.669105	0.759431
ACOXL	12.0336	0.442983	0.58258
ACP1	31.283	0.00178336	0.0213395
ACP2	7.50672	0.822394	0.870962
ACP5	10.0281	0.613496	0.717691
ACP6	17.3414	0.137201	0.276307
ACPP	12.1772	0.431559	0.573149
ACR	16.525	0.168357	0.314818
ACRV1	20.1869	0.0636315	0.17099
ACSBG1	10.4986	0.572305	0.686739
ACSBG2	14.7002	0.258244	0.413646
ACSL1	30.9299	0.00201906	0.0226834
ACSL3	43.3891	1.93984e-05	0.00269598
ACSL4	32.4274	0.0011884	0.0171141
ACSL5	11.2063	0.511326	0.637998
ACSL6	17.983	0.116209	0.248391
ACSM1	16.4225	0.172644	0.319918
ACSM3	12.2546	0.425455	0.567699
ACTA1	27.8214	0.00587458	0.0402975
ACTA2	17.3731	0.136094	0.274784
ACTB	35.6611	0.00036722	0.00984376
ACTC1	33.4731	0.000816326	0.0142932
ACTG1	26.2813	0.0097917	0.0546157
ACTG2	23.5678	0.0232748	0.0906399
ACTL6A	37.7933	0.000165976	0.00698002
ACTL6B	17.1372	0.144507	0.285209
ACTL7A	16.7851	0.157862	0.301994
ACTL7B	8.90258	0.711228	0.789452
ACTL8	22.7873	0.0295866	0.105651
ACTN1	26.3292	0.00963916	0.0541726
ACTN2	28.5736	0.00455629	0.0351184
ACTN3	17.7443	0.123677	0.258182
ACTN4	26.8075	0.00823549	0.0492094
ACTR10	7.97875	0.786789	0.844924
ACTR1A	14.8807	0.248024	0.403455
ACTR1B	10.238	0.595091	0.70375
ACTR2	16.1671	0.1837	0.332586
ACTR3	21.5936	0.0423347	0.132461
ACTR3B	9.33898	0.673737	0.762587
ACTR5	41.7082	3.72873e-05	0.00350343
ACTR6	29.6645	0.00313602	0.0283441
ACTR8	4.92716	0.960368	0.970125
ACVR1	9.89539	0.625138	0.726031
ACVR1B	8.53037	0.742433	0.813062
ACVR2A	20.3956	0.0599631	0.165227
ACVR2B	10.3909	0.581706	0.694045
ACVRL1	10.5261	0.569903	0.684707
ACY1	30.5706	0.00228967	0.0239974
ACYP1	19.4534	0.0781573	0.194345
ACYP2	31.6264	0.00157977	0.0199784
AD7C-NTP	15.6847	0.206109	0.359606
ADA	32.5604	0.00113324	0.0168057
ADAM10	21.9382	0.0382187	0.123826
ADAM11	46.9731	4.71185e-06	0.00169296
ADAM12	11.3462	0.499508	0.628425
ADAM15	23.2867	0.0253879	0.0956312
ADAM17	16.7652	0.158643	0.302807
ADAM18	5.57163	0.93612	0.952511
ADAM19	24.3447	0.0182523	0.0784844
ADAM2	5.72633	0.929244	0.946916
ADAM20	11.8961	0.454062	0.59161
ADAM21	9.20651	0.685198	0.769392
ADAM22	8.18622	0.770414	0.833186
ADAM23	33.76	0.000735881	0.0136752
ADAM28	38.3766	0.000133237	0.00644075
ADAM29	13.4642	0.336225	0.487918
ADAM30	14.6441	0.261478	0.417351
ADAM3A	7.14538	0.847859	0.888553
ADAM7	27.0012	0.00772416	0.0473384
ADAM8	20.0615	0.0659306	0.175054
ADAM9	23.9605	0.0205944	0.0842078
ADAMDEC1	6.5683	0.884776	0.914889
ADAMTS1	10.6746	0.556992	0.674539
ADAMTS12	13.626	0.325227	0.477778
ADAMTS13	12.2419	0.42645	0.568571
ADAMTS2	7.77583	0.802394	0.856992
ADAMTS20	9.67616	0.644347	0.741366
ADAMTS3	12.6572	0.394442	0.541648
ADAMTS5	28.1741	0.0052165	0.0374387
ADAMTS6	9.06592	0.69729	0.778058
ADAMTS7	19.4409	0.0784294	0.19468
ADAMTS8	5.11021	0.954196	0.96545
ADAMTS9	19.8514	0.069949	0.181568
ADAMTSL2	14.1723	0.28984	0.445461
ADAMTSL3	16.5356	0.167916	0.314498
ADAMTSL4	12.7108	0.390405	0.537613
ADAR	16.7638	0.158701	0.302873
ADARB1	17.5574	0.129804	0.26595
ADARB2	10.1192	0.605504	0.711586
ADAT1	10.1686	0.60117	0.70824
ADCK2	23.8645	0.0212213	0.0858502
ADCK4	13.8986	0.307227	0.461446
ADCY1	20.2492	0.0625162	0.169393
ADCY2	21.3711	0.0452029	0.137991
ADCY3	11.9022	0.453569	0.591319
ADCY6	11.2071	0.511263	0.637979
ADCY7	32.1771	0.00129929	0.0179117
ADCY8	21.0776	0.0492556	0.14594
ADCY9	13.5161	0.332668	0.484601
ADCYAP1	9.52224	0.657795	0.75101
ADCYAP1R1	11.1977	0.512057	0.638612
ADD1	29.5146	0.00330223	0.0291616
ADD2	16.8878	0.153867	0.296842
ADD3	43.9051	1.58505e-05	0.00247508
ADFP	26.6496	0.00867596	0.0508588
ADH1A	10.1944	0.598909	0.706199
ADH1A /// ADH1B /// ADH1C	24.5947	0.0168649	0.0745151
ADH1B	25.6452	0.0120445	0.0615702
ADH5	28.7643	0.00427003	0.0340124
ADH6	17.1608	0.143649	0.284061
ADH7	9.75025	0.637861	0.736634
ADI1	41.5164	4.01566e-05	0.00352837
ADIPOQ	15.9213	0.194868	0.345919
ADIPOR1	28.4817	0.00470073	0.0356347
ADIPOR2	21.9465	0.0381233	0.123557
ADK	26.2619	0.00985404	0.0547817
ADM	14.1584	0.290705	0.446378
ADM2	12.9787	0.37059	0.519167
ADMR	15.2909	0.225913	0.380284
ADNP	22.8215	0.0292804	0.104931
ADORA1	22.4426	0.0328485	0.112635
ADORA2A	20.9756	0.0507394	0.148718
ADORA2B	9.52531	0.657527	0.750838
ADORA3	30.0153	0.00277768	0.0265662
ADPGK	22.9531	0.028127	0.102334
ADPRH	17.2848	0.139196	0.27877
ADRA1A	14.5207	0.268701	0.424513
ADRA1B	19.8339	0.0702943	0.182216
ADRA1D	30.8886	0.0020485	0.0228406
ADRA2A	11.57	0.480804	0.612575
ADRA2B	7.60572	0.815133	0.865682
ADRA2C	7.16389	0.846595	0.887854
ADRB1	17.669	0.126116	0.261155
ADRB2	18.6059	0.0984948	0.223711
ADRB3	22.2452	0.0348614	0.116867
ADRBK1	35.6558	0.000367931	0.00984376
ADRBK2	7.97566	0.78703	0.844984
ADRM1	20.4027	0.0598411	0.165006
ADSL	33.7481	0.000739068	0.0136752
ADSS	17.0464	0.147861	0.289388
AEBP1	15.3891	0.220845	0.374874
AES	29.2009	0.00367815	0.0310594
AFAP	3.00945	0.995477	0.996149
AFF1	25.404	0.0130204	0.0644836
AFF2	10.22	0.596669	0.704866
AFF3	35.4045	0.00040364	0.0101803
AFF4	7.42197	0.828516	0.875462
AFG3L2	8.78069	0.72154	0.797646
AFM	7.79997	0.80056	0.855581
AFP	8.11624	0.775982	0.837362
AFTIPHILIN	26.8691	0.00806938	0.0484756
AGA	36.7632	0.000244037	0.0083272
AGBL2	14.5915	0.26454	0.420378
AGC1	25.9462	0.0109237	0.0582508
AGC1 /// LOC649366	20.3098	0.0614477	0.167416
AGER	26.0613	0.0105217	0.0571115
AGGF1	17.4255	0.134279	0.272106
AGL	41.1274	4.66574e-05	0.00377274
AGMAT	15.9999	0.191241	0.341342
AGPAT1	29.7776	0.00301588	0.0278233
AGPAT2	34.72	0.000518869	0.0113674
AGPAT3	12.9468	0.372921	0.521189
AGPAT4	11.6736	0.472239	0.605654
AGPAT5	14.2963	0.282188	0.438078
AGPAT7	34.0213	0.000669353	0.0131331
AGPS	19.8169	0.0706299	0.182908
AGR2	7.97249	0.787277	0.845176
AGRIN	13.6053	0.326622	0.479095
AGRP	12.4139	0.41304	0.557959
AGT	6.72112	0.875479	0.908081
AGTPBP1	27.594	0.00633992	0.0422303
AGTR1	21.1222	0.048619	0.144695
AGTR2	14.0697	0.296277	0.452228
AGTRL1	15.993	0.191557	0.34154
AGXT	12.7836	0.384962	0.531969
AGXT2L1	5.2227	0.950124	0.962918
AHCTF1	19.593	0.0751884	0.189715
AHCY	16.4898	0.169818	0.316528
AHCYL1	18.3159	0.10643	0.23541
AHDC1	24.6374	0.0166376	0.0740392
AHI1	12.4137	0.413054	0.557959
AHNAK	18.9082	0.0907688	0.213115
AHR	27.0905	0.00749869	0.0465554
AHSA1	18.7601	0.0944842	0.218439
AHSA2	18.9969	0.0886038	0.210035
AHSG	21.3958	0.0448769	0.137391
AICDA	12.0655	0.440437	0.580433
AIF1	27.1432	0.00736865	0.0459834
AIM1	30.2241	0.0025834	0.0254938
AIM1L	7.59491	0.815932	0.866043
AIM1L /// FLJ38020	7.59696	0.815781	0.866021
AIM2	28.3105	0.00498148	0.0365381
AIP	13.716	0.31921	0.472633
AIPL1	21.4381	0.0443219	0.136296
AIRE	19.6189	0.0746482	0.189309
AJAP1	27.7561	0.00600489	0.0408136
AK1	9.02778	0.700556	0.780593
AK2	18.8811	0.0914397	0.214026
AK3L1	13.4191	0.339329	0.490343
AK5	9.20699	0.685156	0.769392
AKAP1	15.2384	0.228657	0.383403
AKAP10	21.5668	0.042672	0.133177
AKAP11	16.5964	0.165421	0.311422
AKAP12	26.5666	0.00891642	0.0515735
AKAP13	9.36191	0.671747	0.761143
AKAP2 /// PALM2-AKAP2	36.9737	0.000225609	0.00810809
AKAP3	9.69692	0.64253	0.740297
AKAP4	7.46371	0.825512	0.873155
AKAP5	7.93227	0.790401	0.847448
AKAP6	26.5828	0.00886899	0.0514703
AKAP7	20.0498	0.0661489	0.175494
AKAP8	13.9566	0.303488	0.458513
AKAP8L	10.165	0.601486	0.708424
AKAP9	26.1448	0.0102386	0.0562193
AKR1A1	30.105	0.0026926	0.0259947
AKR1B1	13.7202	0.318929	0.472375
AKR1B10	14.3191	0.280797	0.436591
AKR1C1	20.9293	0.0514254	0.1498
AKR1C2	16.8354	0.155893	0.299269
AKR1C3	22.1047	0.0363634	0.119822
AKR1C4	8.65646	0.731959	0.805427
AKR1D1	11.6163	0.476968	0.609317
AKR7A2	35.6425	0.000369751	0.00986428
AKR7A3	23.8311	0.0214438	0.0862133
AKT1	38.1328	0.000146067	0.00660714
AKT2	20.5145	0.057958	0.161617
AKT3	34.3203	0.000600359	0.0124186
ALAD	11.0013	0.528809	0.652356
ALAS1	27.2679	0.00706909	0.0449551
ALAS2	8.7228	0.726407	0.800903
ALB	16.5651	0.166703	0.31326
ALCAM	21.4659	0.0439603	0.13558
ALDH18A1	13.9727	0.302452	0.457478
ALDH1A1	22.6105	0.0312203	0.109386
ALDH1A2	16.7389	0.159685	0.304226
ALDH1A3	11.6848	0.471314	0.604641
ALDH1B1	21.6456	0.041689	0.131152
ALDH1L1	24.6781	0.0164244	0.0736518
ALDH2	34.3024	0.000604298	0.0124488
ALDH3A1	18.996	0.0886247	0.210035
ALDH3A2	10.8278	0.54373	0.664023
ALDH3B1	34.5514	0.000551839	0.0117313
ALDH3B2	19.3057	0.0814137	0.198905
ALDH4A1	12.3103	0.421088	0.563789
ALDH5A1	19.2696	0.0822276	0.199905
ALDH6A1	30.0094	0.0027833	0.026573
ALDH7A1	18.1486	0.111253	0.241592
ALDH8A1	10.7812	0.547758	0.667239
ALDH9A1	32.9794	0.000975211	0.0155504
ALDOA	39.99	7.21831e-05	0.00460797
ALDOAP2	14.2101	0.287496	0.443084
ALDOB	12.3488	0.418086	0.561969
ALDOC	14.4622	0.272173	0.428172
ALF	7.60931	0.814868	0.8656
ALF /// SALF	6.28589	0.90099	0.926261
ALG12	10.4314	0.578171	0.691029
ALG3	18.1977	0.109819	0.23994
ALG5	18.9375	0.090049	0.212292
ALG6	12.446	0.410558	0.55579
ALG8	13.9423	0.304407	0.459382
ALG9	15.478	0.216328	0.370127
ALK	13.157	0.357731	0.507667
ALKBH1	29.4245	0.00340625	0.0295489
ALKBH4	24.6995	0.0163127	0.0733432
ALLC	28.6889	0.00438107	0.0344851
ALMS1	15.8678	0.197367	0.349147
ALOX12	9.98434	0.617335	0.720665
ALOX12B	33.5602	0.000791057	0.0140536
ALOX12P2	13.5479	0.330505	0.482436
ALOX15	10.2066	0.597843	0.705544
ALOX15B	23.3069	0.0252305	0.0953575
ALOX5	41.0482	4.81013e-05	0.00384292
ALOX5AP	28.6132	0.00449544	0.0348629
ALOXE3	24.868	0.015461	0.071009
ALPI	14.3409	0.279473	0.435498
ALPK1	19.5912	0.0752252	0.189715
ALPK3	45.6157	8.07944e-06	0.00192545
ALPL	9.83686	0.63027	0.73008
ALPP	9.2674	0.679937	0.766581
ALPP /// ALPPL2	29.7471	0.00304778	0.0278844
ALPPL2	23.991	0.0203985	0.0837395
ALS2CL	24.1464	0.0194279	0.0813072
ALS2CR8	23.0547	0.0272655	0.100463
ALX3	19.7652	0.0716593	0.184714
ALX4	6.79535	0.870836	0.905376
AMACR	5.83465	0.924187	0.942711
AMBN	37.6003	0.000178449	0.00714082
AMBP	14.7584	0.254914	0.410423
AMD1	25.4345	0.0128931	0.0641623
AMDHD2	22.9505	0.0281491	0.102334
AMELX	11.5292	0.484195	0.615251
AMELY	10.098	0.607366	0.713031
AMFR	6.33214	0.898422	0.92454
AMH	23.865	0.0212183	0.0858502
AMHR2	10.6578	0.558454	0.675393
AMIGO2	19.1348	0.0853265	0.204806
AMMECR1	24.0763	0.0198603	0.0822627
AMN	9.96463	0.619064	0.72161
AMOT	14.0404	0.298135	0.454129
AMOTL2	11.6611	0.473265	0.606328
AMPD1	18.1659	0.110747	0.24108
AMPD2	14.8635	0.248984	0.404348
AMPD3	12.3307	0.419496	0.56284
AMPH	18.355	0.10533	0.234102
AMT	10.2062	0.597878	0.705544
AMY1A /// AMY1B /// AMY1C /// AMY2A /// AMY2B /// LOC647537 /// LOC648759	22.4329	0.0329453	0.112765
AMZ2	21.1215	0.0486294	0.144695
ANAPC1	29.4218	0.00340947	0.0295576
ANAPC10	30.1119	0.00268611	0.0259884
ANAPC13	22.8465	0.029058	0.104471
ANAPC2	28.0592	0.00542275	0.0383618
ANAPC5	29.9236	0.00286737	0.0270675
ANG /// RNASE4	13.9054	0.306793	0.461219
ANGEL1	17.2309	0.141116	0.281221
ANGEL2	35.9904	0.000325152	0.00933946
ANGPT1	23.3605	0.024817	0.09434
ANGPT2	19.0725	0.0867949	0.207419
ANGPT4	22.2794	0.0345048	0.116283
ANGPTL2	14.0911	0.294926	0.450778
ANGPTL3	9.06051	0.697754	0.77838
ANGPTL4	22.2365	0.0349532	0.116988
ANGPTL7	12.9317	0.374023	0.521935
ANK1	10.2737	0.591962	0.701404
ANK2	21.1569	0.0481289	0.143687
ANK3	14.0167	0.299645	0.45513
ANKFY1	14.8585	0.249266	0.404686
ANKH	25.0694	0.0144974	0.0687495
ANKHD1	22.9428	0.0282157	0.10252
ANKHD1 /// MASK-BP3	37.0999	0.000215221	0.00795424
ANKMY1	6.70442	0.876513	0.90887
ANKMY2	26.0551	0.010543	0.0571806
ANKRA2	26.4408	0.00929279	0.0529396
ANKRD1	11.0216	0.527065	0.65106
ANKRD10	13.1009	0.361752	0.511011
ANKRD11	9.42886	0.665929	0.75707
ANKRD12	23.7959	0.0216808	0.0868665
ANKRD15	13.322	0.346076	0.496756
ANKRD17	9.1935	0.68632	0.770327
ANKRD2	33.2281	0.000891746	0.0149281
ANKRD25	34.5298	0.000556206	0.0117909
ANKRD26	17.5662	0.129511	0.265674
ANKRD27	28.3343	0.00494146	0.0363646
ANKRD28	10.4472	0.576786	0.690054
ANKRD40	6.54873	0.88594	0.915727
ANKRD46	28.0439	0.00545078	0.0384574
ANKRD47	16.7231	0.160312	0.305075
ANKRD49	24.9835	0.0149013	0.0695881
ANKRD5	18.1744	0.110495	0.240809
ANKRD53	17.699	0.125141	0.260152
ANKRD55	17.6011	0.128351	0.264191
ANKRD57	24.0552	0.0199923	0.0826576
ANKRD6	4.66141	0.968343	0.975288
ANKRD7	15.5714	0.211667	0.365608
ANKS1A	13.2317	0.352427	0.502897
ANKS1B	10.9292	0.534997	0.657339
ANKZF1	12.3578	0.417392	0.561546
ANP32A	21.2004	0.0475219	0.142541
ANP32A /// ANP32D /// ANP32C	24.5497	0.0171071	0.0751254
ANP32B	11.6137	0.477177	0.609467
ANP32C	13.0923	0.362369	0.511396
ANP32E	21.9607	0.0379623	0.123204
ANPEP	10.0932	0.607786	0.713263
ANTXR1	18.3495	0.105482	0.234323
ANXA1	10.7811	0.547764	0.667239
ANXA10	13.7471	0.317149	0.47073
ANXA11	29.7809	0.00301242	0.0278233
ANXA13	27.9124	0.00569765	0.0395479
ANXA2	16.5398	0.167742	0.314442
ANXA2P1	12.6845	0.392386	0.539435
ANXA2P2	18.9384	0.0900269	0.21229
ANXA2P3	24.7537	0.0160342	0.0726796
ANXA3	9.74376	0.638429	0.737099
ANXA4	7.61079	0.814759	0.865556
ANXA5	14.7984	0.252647	0.407892
ANXA6	34.9898	0.00047006	0.010803
ANXA7	24.1718	0.0192735	0.0809658
ANXA8 /// LOC653107 /// ANXA8L1	8.423	0.751263	0.819096
ANXA9	22.4679	0.0325979	0.112035
AOAH	23.5267	0.0235732	0.0913487
AOC2	19.6131	0.0747681	0.189478
AOC3	24.0754	0.0198659	0.0822627
AOF2	30.5233	0.00232779	0.0242636
AOX1	27.5957	0.00633647	0.0422284
AP1B1	26.5282	0.00902978	0.0520862
AP1G1	11.5597	0.481658	0.613078
AP1G2	19.4696	0.0778094	0.19379
AP1M2	19.7867	0.0712307	0.184036
AP1S1	19.4122	0.0790542	0.195503
AP1S2	12.0207	0.444016	0.583421
AP1S2 /// LOC653653 /// LOC654127	30.7321	0.00216397	0.0234729
AP2A2	28.3982	0.00483564	0.0359723
AP2B1	17.6822	0.125688	0.260635
AP2M1	11.9914	0.44637	0.585131
AP2S1	12.7875	0.384672	0.531679
AP3B1	16.2666	0.179326	0.327615
AP3B2	23.7882	0.0217329	0.0869707
AP3D1	15.2117	0.230063	0.38489
AP3M2	18.8015	0.0934336	0.216874
AP3S1	10.5839	0.564873	0.680561
AP3S2	12.4412	0.410932	0.555993
AP4E1	13.9269	0.305399	0.460021
AP4M1	19.5265	0.076591	0.192154
AP4S1	14.9573	0.24378	0.399032
APAF1	25.9387	0.0109502	0.0583393
APBA1	19.9125	0.0687595	0.179563
APBA2	17.4909	0.132045	0.269056
APBA2BP	11.3535	0.498887	0.627821
APBA3	29.1693	0.00371816	0.0312982
APBB1	26.8073	0.00823599	0.0492094
APBB1IP	25.0024	0.0148114	0.0693383
APBB2	15.0622	0.23805	0.393195
APBB3	25.5594	0.0123835	0.0625422
APC	18.7667	0.0943169	0.21824
APC2	21.0712	0.0493478	0.146116
APCS	13.9025	0.30698	0.461282
APEH	14.3927	0.276336	0.43192
APEX1	27.9728	0.00558296	0.0390807
APEX2	21.9663	0.0378993	0.12306
APH1A	36.5009	0.000269058	0.00879845
APH1B	15.2617	0.227437	0.381933
API5	29.0356	0.00389233	0.0321956
APIP	30.4435	0.00239348	0.0245267
APITD1	22.1845	0.0355035	0.118005
APLP1	15.0316	0.239715	0.394848
APLP2	20.9483	0.0511425	0.149372
APOA1	10.6559	0.558619	0.675405
APOA2	7.4861	0.823892	0.871944
APOA4	14.7269	0.256713	0.412211
APOB	17.1701	0.143309	0.283797
APOB48R	28.0737	0.00539629	0.0382584
APOBEC1	10.2523	0.593835	0.702801
APOBEC2	26.533	0.00901531	0.0520252
APOBEC3A	15.1149	0.235211	0.389788
APOBEC3B	16.7654	0.158637	0.302807
APOBEC3C	10.5899	0.564348	0.680236
APOBEC3F	35.9796	0.000326453	0.00933946
APOBEC3G	19.7636	0.0716921	0.184763
APOBEC3G /// APOBEC3F	16.4426	0.171794	0.318789
APOC1	17.8509	0.120292	0.253705
APOC2	23.0208	0.02755	0.101027
APOC3	10.6893	0.555713	0.673234
APOC4	19.3087	0.0813458	0.198812
APOD	30.5264	0.00232525	0.024256
APOE	23.6026	0.0230246	0.0900935
APOF	4.68273	0.967746	0.975054
APOH	10.483	0.573666	0.687987
APOL1	18.5383	0.100296	0.226491
APOL2	14.393	0.276316	0.43192
APOL3	20.1241	0.0647753	0.172812
APOL5	29.7101	0.00308699	0.0280992
APOL6	22.0568	0.0368877	0.120893
APOLD1	9.85176	0.628964	0.729137
APOM	23.6634	0.0225934	0.0888419
APP	21.8288	0.0394841	0.126596
APPBP1	22.933	0.0283005	0.102633
APPBP2	27.5977	0.00633223	0.0422212
APPL	35.4796	0.000392628	0.0100933
APRIN	18.9204	0.0904675	0.212792
APRT	30.898	0.00204182	0.022824
APTX	10.3718	0.583381	0.694777
AQP1	8.74707	0.724368	0.799448
AQP2	19.6033	0.0749718	0.189622
AQP3	19.3071	0.0813811	0.198862
AQP4	19.9806	0.0674531	0.177682
AQP5	13.893	0.307595	0.461731
AQP6	20.5376	0.0575755	0.161009
AQP7	17.5326	0.130635	0.267171
AQP8	12.352	0.417842	0.561914
AQP9	14.2194	0.286918	0.44255
AQR	16.95	0.151487	0.293728
AR	9.28086	0.678772	0.76609
ARAF	25.9281	0.010988	0.0583838
ARC	15.4395	0.218274	0.372073
ARCN1	23.4892	0.0238486	0.0919884
ARD1A	17.1941	0.142439	0.282717
AREG	11.969	0.448174	0.586575
AREG /// LOC653193	10.5577	0.567158	0.682082
ARF1	9.2572	0.680819	0.767057
ARF1P1	11.3028	0.503163	0.631364
ARF3	19.8461	0.070054	0.181805
ARF4	13.3187	0.346306	0.496872
ARF5	28.9772	0.00397082	0.0327339
ARF6	32.8435	0.00102396	0.0158642
ARFGAP1	20.8373	0.052814	0.152356
ARFGAP3	21.5956	0.0423108	0.132421
ARFGEF1	8.96339	0.706054	0.784949
ARFGEF2	16.0509	0.188916	0.338789
ARFIP1	34.1728	0.000633475	0.0127095
ARFIP2	33.8299	0.00071747	0.0135807
ARFRP1	35.286	0.000421629	0.0102547
ARG1	22.5665	0.0316398	0.110115
ARG2	16.1303	0.185339	0.33484
ARHGAP1	17.8467	0.120425	0.253824
ARHGAP10	23.1434	0.0265331	0.0988769
ARHGAP11A	6.34535	0.897682	0.924284
ARHGAP12	27.291	0.00701508	0.0447396
ARHGAP15	41.4869	4.06159e-05	0.00352837
ARHGAP17	36.1143	0.000310566	0.00925211
ARHGAP19	21.7348	0.0406016	0.128672
ARHGAP22	21.068	0.0493936	0.146219
ARHGAP24	11.7793	0.463567	0.598359
ARHGAP25	25.4235	0.0129389	0.0642705
ARHGAP26	14.6174	0.26303	0.418776
ARHGAP28	19.069	0.0868779	0.207542
ARHGAP29	15.4666	0.216905	0.370591
ARHGAP4	26.3024	0.00972422	0.0543757
ARHGAP5	24.3769	0.0180675	0.078012
ARHGAP6	3.89201	0.985307	0.988121
ARHGAP8 /// LOC553158	6.87065	0.866042	0.901868
ARHGDIA	30.8395	0.0020841	0.0230478
ARHGDIB	6.63299	0.880884	0.911915
ARHGDIG	22.9457	0.0281907	0.102457
ARHGEF1	29.6352	0.00316788	0.0285002
ARHGEF10	21.0304	0.0499377	0.147242
ARHGEF10L	13.025	0.367226	0.516338
ARHGEF11	13.7882	0.314435	0.46837
ARHGEF12	6.26494	0.902142	0.926916
ARHGEF15	16.1032	0.186555	0.336297
ARHGEF16	9.4284	0.665969	0.75707
ARHGEF17	14.8156	0.251678	0.406968
ARHGEF18	16.5095	0.168996	0.315437
ARHGEF2	24.1023	0.0196989	0.0818096
ARHGEF3	15.2617	0.227436	0.381933
ARHGEF4	25.0688	0.0145	0.0687495
ARHGEF5	6.30771	0.899783	0.925376
ARHGEF6	24.2768	0.0186469	0.0794134
ARHGEF7	5.87579	0.922213	0.941406
ARHGEF9	8.49823	0.745085	0.814678
ARID1A	34.3236	0.000599642	0.0124186
ARID3A	3.58176	0.989857	0.991716
ARID3B	11.3021	0.503223	0.631372
ARID4A	20.603	0.0565055	0.158937
ARID4B	34.776	0.000508352	0.0112549
ARID5A	24.7419	0.0160945	0.0727415
ARID5B	21.7545	0.0403651	0.128196
ARIH1	9.77836	0.635398	0.73468
ARIH2	14.787	0.253294	0.408639
ARL1	29.4263	0.00340421	0.0295489
ARL14	6.98798	0.858407	0.895805
ARL15	9.53422	0.65675	0.75042
ARL17P1	19.2945	0.0816658	0.199339
ARL2	15.1356	0.234107	0.388687
ARL2BP	24.1877	0.0191775	0.080661
ARL3	15.7766	0.201683	0.354292
ARL4A	12.9246	0.374546	0.522275
ARL4C	43.4728	1.87736e-05	0.00269331
ARL4D	15.673	0.206675	0.360102
ARL5A	29.3243	0.00352567	0.030205
ARL6IP1	15.9875	0.191809	0.341854
ARL6IP2	11.4866	0.487741	0.618695
ARL6IP4	7.72925	0.805915	0.85917
ARL6IP5	28.0294	0.00547749	0.0385447
ARL8B	18.6061	0.0984884	0.223711
ARMC1	25.6639	0.0119719	0.0614579
ARMC4	25.1126	0.0142982	0.06836
ARMC6	21.6915	0.0411264	0.129903
ARMC7	22.3823	0.033452	0.11374
ARMC8	10.6713	0.557281	0.674705
ARMC9	21.2376	0.0470075	0.14167
ARMCX1	13.858	0.309871	0.464058
ARMCX2	8.70509	0.727892	0.802166
ARMCX3	25.2578	0.0136472	0.0664771
ARMCX5	17.6738	0.125959	0.260994
ARMCX6 /// LOC653354	33.7506	0.000738394	0.0136752
ARMET	22.8806	0.0287569	0.10386
ARNT	10.7946	0.5466	0.666307
ARNT2	7.59541	0.815895	0.866043
ARNTL	13.6349	0.32463	0.477131
ARNTL2	12.8714	0.378458	0.525923
ARPC1A	8.8294	0.717428	0.794421
ARPC1B /// LOC653888	12.4209	0.412495	0.557374
ARPC2	13.9607	0.303223	0.458166
ARPC3	28.7959	0.00422425	0.0339031
ARPC4	28.7873	0.00423676	0.0339694
ARPC5	12.7991	0.383811	0.530858
ARPC5L	10.6609	0.558182	0.675307
ARPP-19	16.5029	0.169274	0.315867
ARPP-21	12.1017	0.437544	0.578102
ARR3	18.3423	0.105684	0.234655
ARRB1	12.331	0.419479	0.56284
ARRB2	31.5901	0.00160018	0.0200843
ARS2	23.9034	0.020965	0.0851231
ARSA	11.8264	0.459718	0.595376
ARSB	15.4687	0.216801	0.370522
ARSD	7.06403	0.853353	0.893017
ARSE	21.973	0.0378233	0.122932
ARSF	26.987	0.00776059	0.0475163
ARSJ	9.60748	0.650353	0.745859
ART1	9.34418	0.673285	0.762238
ART3	18.5845	0.0990613	0.22466
ART4	16.4708	0.170611	0.317741
ARTN	33.3587	0.000850756	0.0145284
ARTS-1	15.8418	0.198589	0.350297
ARVCF	21.6568	0.0415508	0.130841
ASAH1	25.4085	0.0130014	0.0644381
ASAHL	18.5768	0.0992655	0.224932
ASB1	8.56038	0.73995	0.811076
ASB13	10.1872	0.599539	0.706692
ASB4	15.4324	0.218639	0.372382
ASB6	23.4667	0.024015	0.0923478
ASB7	17.756	0.123304	0.257746
ASB8	12.292	0.422526	0.565204
ASB9	11.9581	0.449047	0.587428
ASCC1	23.2149	0.0259563	0.0972506
ASCC2	18.9908	0.0887516	0.210212
ASCC3	15.3085	0.224995	0.379118
ASCC3L1	19.7809	0.0713453	0.184189
ASCC3L1 /// LOC652147	12.5421	0.40318	0.549461
ASCIZ	34.0747	0.000656493	0.012957
ASCL1	12.4242	0.412239	0.557141
ASCL2	12.1294	0.435346	0.576504
ASCL3	11.7602	0.465123	0.599408
ASF1A	30.4488	0.00238902	0.0245187
ASF1B	35.3697	0.000408836	0.0102231
ASGR1	13.9915	0.301254	0.456647
ASGR2	27.7836	0.00594957	0.0405409
ASH1L	18.9926	0.088708	0.210183
ASH2L	25.13	0.0142186	0.0682146
ASIP	18.9329	0.0901614	0.212457
ASL	16.2201	0.181364	0.330066
ASMT	11.383	0.496411	0.625766
ASMTL	20.8314	0.0529047	0.152487
ASNA1	27.5298	0.00647769	0.0427636
ASNS	29.7984	0.00299423	0.0277424
ASNSD1	12.2027	0.429538	0.571546
ASPA	16.923	0.152519	0.295042
ASPH	16.9286	0.152304	0.29478
ASPHD1	21.6388	0.041773	0.131265
ASPM	11.203	0.511602	0.638223
ASPN	22.4499	0.0327765	0.112475
ASPSCR1	21.6776	0.0412963	0.130252
ASRGL1	19.9062	0.0688815	0.179776
ASS1	10.3003	0.58963	0.699586
ASTE1	27.0604	0.00757405	0.0467818
ASTN1	9.55305	0.655106	0.749287
ASTN2	11.8087	0.461164	0.596264
ASXL1	18.2575	0.108093	0.23747
ASXL2	30.2827	0.00253131	0.0252045
ATAD2	24.1724	0.0192699	0.0809658
ATAD3A	9.16116	0.689107	0.772333
ATAD4	16.0386	0.189473	0.339529
ATBF1	9.10659	0.6938	0.775396
ATF1	31.4808	0.00166322	0.0204522
ATF2	14.8557	0.249421	0.404759
ATF3	13.4895	0.334489	0.486297
ATF4	8.72039	0.726609	0.801059
ATF5	17.5522	0.129979	0.2661
ATF6	14.3613	0.278233	0.434021
ATF7	20.7393	0.0543311	0.154808
ATF7IP	20.3327	0.0610492	0.16691
ATF7IP2	24.0965	0.0197348	0.0819233
ATG10	11.0494	0.524693	0.649152
ATG12	13.1518	0.358102	0.507952
ATG16L1	16.3216	0.176947	0.325224
ATG3	29.8505	0.0029408	0.0275535
ATG4A	12.4555	0.409829	0.555289
ATG4B	22.5575	0.0317266	0.110205
ATG4B /// LOC653202	12.1005	0.437641	0.57812
ATG5	13.0734	0.36373	0.512773
ATG7	16.1103	0.186236	0.336093
ATHL1	22.0114	0.037392	0.121977
ATIC	21.0419	0.0497702	0.14699
ATM	41.4726	4.08419e-05	0.00352837
ATM /// LOC651610	32.769	0.0010517	0.0160179
ATN1	16.6203	0.164448	0.310033
ATOH1	20.2694	0.0621592	0.168734
ATOX1	20.1015	0.0651898	0.173537
ATP10A	18.0008	0.115668	0.247552
ATP10B	9.60721	0.650377	0.745859
ATP10D	27.0919	0.00749526	0.0465554
ATP11A	7.41143	0.829271	0.875882
ATP11B	34.2814	0.000608936	0.0124991
ATP12A	10.0296	0.613364	0.717609
ATP13A1	18.1634	0.110819	0.241159
ATP13A2	11.3061	0.502885	0.631185
ATP13A3	17.5205	0.131044	0.267543
ATP1A1	16.3026	0.177766	0.326194
ATP1A2	29.649	0.00315276	0.0283834
ATP1A3	25.0052	0.014798	0.0693383
ATP1B1	18.6907	0.09627	0.220579
ATP1B2	23.3674	0.0247642	0.094186
ATP1B3	6.64895	0.879914	0.911316
ATP1B4	19.9697	0.0676618	0.177951
ATP2A1	13.57	0.329008	0.48116
ATP2A2	16.501	0.16935	0.315921
ATP2A3	33.4093	0.000835369	0.0144979
ATP2B1	20.6785	0.0552911	0.156844
ATP2B2	21.1605	0.0480783	0.1436
ATP2B3	10.3664	0.583852	0.694962
ATP2B4	42.3431	2.9156e-05	0.003112
ATP2C1	45.5	8.45804e-06	0.00192545
ATP4A	24.9789	0.014923	0.0696161
ATP4B	18.9665	0.0893404	0.211157
ATP5A1	33.6916	0.000754335	0.013734
ATP5B	21.04	0.0497973	0.14699
ATP5C1	25.2653	0.0136146	0.0663913
ATP5D	31.6854	0.0015471	0.0197605
ATP5E	34.0262	0.000668149	0.0131288
ATP5F1	30.6545	0.00222353	0.0237569
ATP5G1	22.278	0.0345195	0.116303
ATP5G2	18.8175	0.0930298	0.216153
ATP5G3	27.7628	0.00599126	0.0407635
ATP5H	32.347	0.00122299	0.0173218
ATP5I	32.325	0.0012326	0.0174209
ATP5J	25.8193	0.0113835	0.0594692
ATP5J2	19.5787	0.0754873	0.190064
ATP5L	27.1705	0.00730191	0.0457166
ATP5O	28.1384	0.0052798	0.0376903
ATP5S	20.4041	0.0598178	0.164997
ATP6AP1	31.3353	0.00175081	0.0211015
ATP6AP2	13.5417	0.330929	0.482753
ATP6V0A1	16.4741	0.170473	0.317616
ATP6V0A2	16.3032	0.177738	0.326188
ATP6V0A4	15.1667	0.232447	0.387469
ATP6V0B	22.1946	0.0353956	0.117858
ATP6V0C	35.2789	0.000422734	0.0102547
ATP6V0D1	27.4972	0.0065487	0.0429859
ATP6V0E	35.4846	0.000391905	0.0100933
ATP6V0E2L	16.9944	0.14981	0.29162
ATP6V1A	24.3136	0.0184322	0.0787768
ATP6V1B1	15.5844	0.211019	0.36488
ATP6V1B2	3.81953	0.986477	0.988997
ATP6V1C1	25.487	0.0126764	0.0635345
ATP6V1D	26.1724	0.0101469	0.0558351
ATP6V1E1	22.7077	0.0303122	0.10729
ATP6V1F	21.5209	0.0432542	0.134334
ATP6V1G1	22.7173	0.0302244	0.107163
ATP6V1G2	9.97707	0.617972	0.721093
ATP6V1H	12.0733	0.43981	0.580066
ATP7A /// LOC644732	22.3341	0.0339414	0.114994
ATP7B	10.2212	0.596558	0.704798
ATP8A1	10.8347	0.543132	0.663742
ATP8A2	6.51376	0.888006	0.916983
ATP8B1	33.8216	0.000719649	0.0135807
ATP8B2	23.6036	0.0230172	0.0900935
ATP8B3	11.6231	0.476406	0.608949
ATP8B4	20.1289	0.0646873	0.172612
ATP9A	2.5149	0.998107	0.998332
ATP9B	20.1136	0.0649669	0.173184
ATPAF2	33.8611	0.000709396	0.0134831
ATPBD1B	12.7053	0.390819	0.537945
ATPBD1C	19.9751	0.0675577	0.177809
ATPIF1	42.0939	3.21151e-05	0.00324606
ATR	25.1122	0.0143002	0.06836
ATR /// LOC648152	29.3893	0.0034478	0.0297545
ATRN	18.7525	0.0946778	0.218597
ATRNL1	12.0617	0.440738	0.580571
ATRX	20.8121	0.0532002	0.153072
ATRX /// LOC642995	7.00984	0.856963	0.895138
ATXN1	22.129	0.0360993	0.119321
ATXN10	9.53924	0.656311	0.7501
ATXN2	15.563	0.212079	0.36586
ATXN2L	18.8857	0.0913246	0.213989
ATXN3	23.679	0.0224843	0.0886114
ATXN3L	10.2644	0.592775	0.701944
ATXN7	31.5059	0.00164852	0.0203842
ATXN7L1	16.7759	0.158225	0.302268
ATXN7L1 /// ATXN7L4	18.2692	0.107758	0.237049
ATXN8OS	21.2692	0.0465753	0.140749
AUH	7.48586	0.823909	0.871944
AUP1	16.5614	0.166852	0.31342
AURKA	8.21757	0.767906	0.831821
AURKAIP1 /// LOC643556	7.03032	0.855603	0.89432
AURKB	18.5203	0.100782	0.227133
AURKC	7.23845	0.841462	0.883999
AUTS2	20.7806	0.0536869	0.15382
AVEN	8.89441	0.711922	0.790024
AVIL	13.4773	0.335325	0.487142
AVP	29.8853	0.00290559	0.0273195
AVPI1	18.9456	0.0898498	0.212023
AVPR1A	11.9812	0.447189	0.585639
AVPR1B	13.201	0.354605	0.504816
AVPR2	4.77112	0.96519	0.973276
AXIN1	17.5996	0.128399	0.264204
AXL	13.8714	0.308998	0.463376
AYTL2	16.6337	0.163905	0.309528
AZGP1	20.4176	0.0595871	0.164599
AZI1	9.82998	0.630874	0.730462
AZI2	27.7436	0.00603007	0.0409223
AZIN1	33.5309	0.00079948	0.0141229
AZU1	20.3528	0.0606993	0.166294
B2M	49.7793	1.52749e-06	0.0011211
B3GALNT1	7.57647	0.81729	0.86714
B3GALT1	17.1207	0.145111	0.285986
B3GALT2	6.22489	0.904324	0.928408
B3GALT4	11.8224	0.460046	0.595448
B3GALT5	14.1085	0.293836	0.44968
B3GAT1	7.94561	0.789366	0.846806
B3GAT3	24.71	0.0162583	0.0732832
B3GNT1	13.768	0.315769	0.469624
B3GNT2	2.81983	0.996688	0.997173
B3GNT3	9.13295	0.691535	0.773531
B3GNT4	11.0271	0.5266	0.65068
B3GNTL1	13.3585	0.343528	0.494535
B4GALNT1	8.62457	0.734619	0.807354
B4GALT1	20.5316	0.0576749	0.161188
B4GALT2	18.0784	0.113331	0.244485
B4GALT3	15.826	0.199335	0.351347
B4GALT4	19.3685	0.080015	0.196785
B4GALT5	18.2281	0.108939	0.238626
B4GALT6	18.0253	0.114925	0.246872
B4GALT7	22.9511	0.028144	0.102334
BAALC	9.93393	0.621757	0.723347
BAAT	7.15881	0.846942	0.888008
BACE1	23.8709	0.0211792	0.0857843
BACE2	10.8477	0.542016	0.662839
BACH1	27.8728	0.00577393	0.0398323
BACH2	18.8194	0.0929814	0.21614
BAD	17.6221	0.127654	0.263322
BAG1	21.6	0.042255	0.132309
BAG2	19.4502	0.0782274	0.194359
BAG3	21.5502	0.0428815	0.133675
BAG4	17.548	0.130122	0.266352
BAG5	18.9736	0.0891666	0.210858
BAGE	10.0189	0.614307	0.718239
BAHCC1	8.97677	0.704913	0.784138
BAHD1	16.6079	0.16495	0.310797
BAI1	15.7912	0.200986	0.353347
BAI2	8.06208	0.780261	0.840281
BAI3	10.5708	0.566011	0.681194
BAIAP2	18.3351	0.105889	0.234831
BAIAP2L2	10.9307	0.53487	0.657339
BAIAP3	14.6413	0.261642	0.417464
BAK1 /// BCL2L7P1	16.798	0.157354	0.301251
BAMBI	16.8484	0.15539	0.298605
BANF1	41.2393	4.46876e-05	0.00369767
BANK1	18.0343	0.114653	0.246568
BANP	16.0507	0.188924	0.338789
BAP1	30.7055	0.00218416	0.0235929
BAPX1	9.36548	0.671438	0.760927
BARD1	10.5926	0.564116	0.680143
BARX1	9.99464	0.616431	0.719673
BARX2	11.2343	0.508957	0.636112
BASP1	16.9635	0.150976	0.293211
BAT1	24.7607	0.0159984	0.0726517
BAT2	31.5508	0.00162255	0.0202318
BAT2D1	27.3999	0.00676494	0.0438301
BAT3	34.877	0.000489907	0.011044
BATF	13.936	0.304815	0.459634
BAX	26.5076	0.00909105	0.0522608
BAZ1A	7.27275	0.839076	0.882362
BAZ1B	16.6236	0.164312	0.309946
BAZ2A	28.7506	0.00429002	0.0340902
BAZ2B	18.2024	0.109681	0.2397
BBC3	20.379	0.060248	0.165632
BBOX1	29.1669	0.00372118	0.0313039
BBS1	9.33062	0.674462	0.762989
BBS10	29.6123	0.00319299	0.0285778
BBS4	9.90866	0.623974	0.72499
BBS7	5.56385	0.936455	0.952736
BC37295_3	11.0699	0.522942	0.647946
BCAM	21.7688	0.0401936	0.127969
BCAN	15.3159	0.224611	0.378818
BCAP29	29.2623	0.00360143	0.0305755
BCAP31	21.8545	0.0391837	0.125973
BCAR3	14.0359	0.298421	0.45415
BCAS1	6.09685	0.911121	0.933439
BCAS2	27.3606	0.00685422	0.0440519
BCAS3	32.3711	0.00121252	0.0172284
BCAS4	6.3848	0.895456	0.922491
BCAT1	30.3997	0.00243031	0.0247061
BCAT2	25.8537	0.0112572	0.0590152
BCCIP	18.5096	0.10107	0.227552
BCDIN3	31.9183	0.00142451	0.0189112
BCHE	8.84305	0.716274	0.793402
BCKDHA	11.9213	0.45202	0.590093
BCKDHB	15.8662	0.197443	0.349189
BCKDK	19.198	0.0838604	0.202326
BCL10	26.0425	0.0105861	0.0573027
BCL11A	12.2361	0.426911	0.568959
BCL11B	9.27722	0.679088	0.766154
BCL2	23.047	0.0273293	0.100587
BCL2A1	21.0655	0.0494298	0.146294
BCL2L1	24.1555	0.0193726	0.0811775
BCL2L10	10.3396	0.586197	0.696628
BCL2L11	15.8637	0.197558	0.3493
BCL2L13	11.5676	0.481	0.612686
BCL2L14	15.3087	0.224988	0.379118
BCL2L2	8.84331	0.716252	0.793402
BCL3	21.2992	0.0461677	0.140025
BCL6	17.3141	0.138159	0.277376
BCL7A	37.0402	0.000220075	0.0080332
BCL7B	28.38	0.00486551	0.0360785
BCL7C	19.6027	0.0749854	0.189622
BCL9	11.175	0.513983	0.640295
BCLAF1	22.1783	0.0355697	0.118141
BCMO1	7.46185	0.825646	0.873159
BCOR	17.8061	0.121706	0.255635
BCORL1	12.6878	0.392132	0.539252
BCR	15.1943	0.230984	0.385946
BCS1L	24.7185	0.0162147	0.0731113
BDH1	23.031	0.0274637	0.100779
BDH2	23.3289	0.02506	0.0949049
BDKRB1	8.94085	0.707974	0.78668
BDKRB2	8.08491	0.778461	0.839024
BDNF	8.14083	0.774031	0.836204
BEAN	15.5932	0.210587	0.364464
BECN1	14.3865	0.276712	0.432407
BET1	11.5852	0.47954	0.61149
BET1L	4.24105	0.978683	0.983771
BEX1	13.1894	0.355425	0.50566
BEXL1	10.0438	0.612115	0.716919
BFAR	8.13762	0.774285	0.836263
BFSP1	24.2923	0.0185565	0.0790993
BFSP2	6.58678	0.88367	0.914219
BGLAP	28.4178	0.00480374	0.0359291
BGN	28.5952	0.0045229	0.0349587
BGN /// TSHZ1	22.8371	0.0291416	0.104659
BHLHB2	16.4574	0.171173	0.31814
BHLHB3	17.6395	0.127084	0.262511
BHLHB9	10.3242	0.587538	0.697787
BHMT	20.4844	0.0584596	0.162527
BHMT2	11.4523	0.490603	0.621439
BICC1	12.086	0.438795	0.579299
BICD1	16.3284	0.176656	0.324846
BICD2	32.0117	0.00137807	0.0184971
BID	12.5973	0.39898	0.545862
BIK	24.4459	0.0176779	0.076802
BIN1	31.5397	0.00162894	0.020256
BIN2	9.07603	0.696423	0.777286
BIN3	16.005	0.191009	0.341203
BIRC1 /// LOC648984 /// LOC653371	13.0671	0.36418	0.513245
BIRC1 /// LOC653371	11.3748	0.497098	0.626337
BIRC2	31.8723	0.00144795	0.0191273
BIRC3	21.0004	0.0503751	0.147975
BIRC4	22.7199	0.0302006	0.107107
BIRC4BP	24.0536	0.0200019	0.0826576
BIRC5	30.5121	0.00233687	0.024268
BIRC7	33.3795	0.000844391	0.0144992
BLCAP	9.13276	0.691551	0.773531
BLK	39.2344	9.62731e-05	0.00541279
BLM	11.0576	0.523991	0.648644
BLMH	12.9828	0.370291	0.519006
BLNK	29.6308	0.00317264	0.0285031
BLOC1S1	23.3061	0.0252367	0.0953575
BLR1	25.7545	0.0116255	0.0604943
BLVRA	24.4713	0.0175366	0.0763868
BLVRB	15.2956	0.225668	0.37992
BLZF1	20.523	0.0578163	0.161378
BMI1	31.5803	0.00160575	0.0201079
BMP1	13.6518	0.323495	0.476178
BMP10	43.3119	1.99922e-05	0.0027218
BMP15	13.7409	0.317558	0.471185
BMP2	21.6731	0.0413515	0.130305
BMP2K	17.3867	0.135622	0.27408
BMP3	15.6306	0.208745	0.362499
BMP4	22.2396	0.0349205	0.116988
BMP5	9.95271	0.62011	0.722059
BMP6	9.02564	0.700739	0.780663
BMP7	21.2236	0.0471999	0.141929
BMP8A	13.0816	0.363136	0.512139
BMP8B	21.867	0.0390372	0.125654
BMPER	13.8201	0.312347	0.466301
BMPR1A	12.799	0.383817	0.530858
BMPR1B	28.2962	0.00500556	0.0366543
BMPR2	19.3406	0.0806329	0.197815
BMS1L	22.5858	0.0314556	0.109874
BMX	7.42288	0.828451	0.875462
BNC1	13.6563	0.323194	0.475997
BNC2	29.4694	0.00335409	0.0294216
BNIP1	16.9603	0.151096	0.29331
BNIP2	21.437	0.0443357	0.136296
BNIP3	24.0083	0.0202883	0.0834494
BNIP3L	28.0923	0.00536265	0.0381186
BOK	18.7527	0.0946749	0.218597
BOLA1	43.4177	1.91824e-05	0.00269598
BOLA2 /// BOLA2B	11.0923	0.521026	0.646113
BOP1 /// LOC653119	32.7379	0.00106348	0.0161237
BP75	38.2746	0.000138465	0.00645942
BPESC1	11.6566	0.473641	0.606646
BPGM	8.11201	0.776317	0.837657
BPHL	14.8128	0.251833	0.407168
BPI	19.0004	0.0885186	0.209884
BPNT1	13.3021	0.347472	0.49817
BPY2 /// BPY2B /// BPY2C	27.4691	0.00661048	0.0432551
BRAF	9.65607	0.646105	0.742429
BRAP	20.1764	0.0638223	0.171228
BRCA1	4.84251	0.963033	0.971994
BRCA2	6.32736	0.898689	0.924551
BRCC3	10.2318	0.595632	0.703984
BRD1	13.7074	0.319781	0.473058
BRD2	22.6873	0.030501	0.107629
BRD3	8.75762	0.723482	0.798866
BRD4	31.4594	0.00167582	0.0205315
BRD7	13.9314	0.30511	0.459767
BRD8	31.094	0.00190599	0.0220405
BRD9	20.1072	0.0650855	0.173431
BRDG1	18.0114	0.115344	0.247385
BRDT	10.0763	0.60927	0.714501
BRE	23.1355	0.0265974	0.099013
BRF1	10.4937	0.572735	0.687056
BRF2	10.6198	0.561751	0.678148
BRIP1	20.3738	0.0603365	0.165776
BRMS1	14.5867	0.264822	0.420713
BRP44	9.57938	0.652808	0.747747
BRP44L	25.1338	0.0142015	0.0682059
BRPF1	13.0746	0.363641	0.512702
BRSK2	30.0751	0.00272064	0.0261707
BRWD1	19.252	0.082626	0.200728
BRWD2	26.7366	0.00843047	0.0500583
BSCL2 /// HNRPUL2	16.4504	0.171467	0.318434
BSDC1	13.5549	0.33003	0.482022
BSG	48.9342	2.14783e-06	0.00127828
BSN	20.0554	0.0660451	0.175288
BSPRY	15.3382	0.22346	0.377776
BST1	15.8769	0.196941	0.348579
BST2	20.9965	0.0504312	0.148039
BTAF1	38.9764	0.000106182	0.00567961
BTBD1	19.0443	0.0874651	0.208126
BTBD14B	8.18529	0.770488	0.833186
BTBD2	27.4498	0.0066532	0.0434243
BTBD3	10.1503	0.602776	0.709505
BTBD5	12.7769	0.385461	0.532494
BTBD7	16.7153	0.160625	0.30537
BTBD9	14.9199	0.245849	0.40116
BTC	13.2604	0.350402	0.500996
BTD	15.9252	0.194687	0.345645
BTF3	18.0405	0.114468	0.246287
BTG1	21.0952	0.0490039	0.145517
BTG2	25.7602	0.0116039	0.0604055
BTG3	22.2482	0.0348299	0.116847
BTG4	15.3266	0.224059	0.378166
BTK	16.3527	0.175611	0.323663
BTN1A1	10.7746	0.54833	0.667502
BTN2A1	25.5921	0.0122532	0.0622107
BTN2A2	27.3723	0.00682741	0.0439418
BTN2A3	11.6299	0.475843	0.608579
BTN3A1	19.6758	0.0734726	0.187524
BTN3A2	22.793	0.0295352	0.105533
BTN3A3	17.4709	0.132727	0.270151
BTN3A3 /// BTN3A2	24.9284	0.0151658	0.0703116
BTNL2	34.9366	0.000479318	0.0108945
BTNL3	22.8557	0.0289763	0.104346
BTNL8 /// LOC653117	31.6858	0.00154692	0.0197605
BTRC	21.0292	0.0499543	0.147258
BUB1	13.6047	0.326662	0.479095
BUB1B	19.3042	0.0814475	0.198952
BUB3	33.5299	0.00079976	0.0141229
BUD31	23.9934	0.0203831	0.0837032
BXDC2	15.4907	0.215693	0.369562
BXDC5	28.5166	0.0046454	0.035462
BYSL	28.0904	0.00536596	0.0381217
BZRAP1	19.7542	0.0718803	0.184997
BZRPL1	16.078	0.187688	0.337576
BZW1 /// LOC151579	14.4506	0.272861	0.428749
BZW2	25.3873	0.0130907	0.0646596
C10ORF10	16.0078	0.19088	0.34111
C10ORF110	4.44883	0.97391	0.979711
C10ORF116	16.5328	0.168031	0.314587
C10ORF118	23.8153	0.0215495	0.0864703
C10ORF119	21.3261	0.0458047	0.139125
C10ORF12	10.8317	0.543394	0.663916
C10ORF137	38.0921	0.000148325	0.00661856
C10ORF18	30.8384	0.00208486	0.0230478
C10ORF22	23.1048	0.0268489	0.0995603
C10ORF26	28.8881	0.00409356	0.0332418
C10ORF28	35.9074	0.000335283	0.00940971
C10ORF38	12.3336	0.419271	0.56284
C10ORF56	12.5867	0.399781	0.546447
C10ORF57	15.7442	0.203234	0.356266
C10ORF59	14.2218	0.28677	0.442462
C10ORF6	11.911	0.452852	0.590668
C10ORF61	14.9627	0.243483	0.398649
C10ORF68	17.7819	0.122474	0.256578
C10ORF7	30.4953	0.00235064	0.024268
C10ORF72	14.7129	0.257516	0.413005
C10ORF76	38.6775	0.000118914	0.00604633
C10ORF77	14.9445	0.244487	0.399629
C10ORF79	9.12595	0.692137	0.774056
C10ORF81	5.50896	0.938789	0.954455
C10ORF84	7.88947	0.793707	0.850095
C10ORF86	25.5721	0.0123329	0.0623706
C10ORF88	19.0466	0.0874099	0.208126
C10ORF92	9.2419	0.682142	0.767753
C10ORF95	35.365	0.000409548	0.0102231
C10ORF97	26.7197	0.00847778	0.0502059
C11ORF1	6.95511	0.860566	0.897356
C11ORF10	27.5521	0.00642953	0.042592
C11ORF11	20.1919	0.0635413	0.170818
C11ORF16	22.3447	0.0338332	0.114802
C11ORF17	11.168	0.514579	0.640679
C11ORF17 /// NUAK2	19.4106	0.079089	0.195517
C11ORF2	25.5859	0.0122777	0.062285
C11ORF21	21.913	0.0385062	0.124485
C11ORF24	15.4951	0.215469	0.369225
C11ORF30	18.0782	0.113337	0.244485
C11ORF32	16.3322	0.17649	0.324612
C11ORF41	15.2068	0.23032	0.385175
C11ORF48	19.431	0.0786447	0.194891
C11ORF49	6.33273	0.898389	0.92454
C11ORF51	12.0843	0.438936	0.579371
C11ORF57	7.11284	0.850067	0.890235
C11ORF58	40.5685	5.78396e-05	0.00419379
C11ORF60	14.0709	0.296206	0.452179
C11ORF61	26.8423	0.0081413	0.0487947
C11ORF63	7.24317	0.841134	0.883794
C11ORF67	21.287	0.0463323	0.140237
C11ORF68	24.5066	0.0173422	0.0758374
C11ORF71	6.74685	0.873879	0.907126
C11ORF73	32.3168	0.00123622	0.0174242
C11ORF75	17.1584	0.143737	0.284109
C11ORF9	19.2807	0.0819768	0.199514
C12ORF10	16.0007	0.191206	0.341335
C12ORF11	30.2818	0.00253209	0.0252045
C12ORF22	15.4836	0.216046	0.369787
C12ORF24	31.0599	0.00192899	0.0222058
C12ORF29	18.2372	0.108675	0.238262
C12ORF31	5.84149	0.923861	0.942582
C12ORF35	32.9751	0.000976729	0.0155504
C12ORF38	18.8431	0.0923868	0.215325
C12ORF39	11.7505	0.465921	0.600204
C12ORF4	18.7288	0.0952856	0.219598
C12ORF41	28.2565	0.00507334	0.0370085
C12ORF43	15.2818	0.226384	0.380753
C12ORF44	17.6008	0.12836	0.264191
C12ORF47	29.1469	0.00374679	0.0314017
C12ORF48	10.1973	0.598657	0.706014
C12ORF49	15.4624	0.217119	0.370738
C12ORF5	11.8447	0.458228	0.594335
C12ORF52	14.5018	0.269821	0.425576
C13ORF1	28.8582	0.00413556	0.0334404
C13ORF18	30.1986	0.00260647	0.0256072
C13ORF23	19.2133	0.08351	0.201925
C13ORF24	28.2103	0.0051531	0.0372302
C13ORF34	28.7585	0.00427852	0.0340255
C13ORF7	31.0912	0.0019079	0.0220405
C14ORF1	22.1986	0.0353533	0.117774
C14ORF10	21.3356	0.0456774	0.138885
C14ORF101	23.4254	0.0243238	0.093071
C14ORF102	9.4993	0.659795	0.752457
C14ORF103	18.217	0.10926	0.239007
C14ORF104	9.88768	0.625814	0.726495
C14ORF105	14.3937	0.276279	0.43192
C14ORF106	14.3034	0.281753	0.437721
C14ORF108	24.6979	0.0163211	0.0733433
C14ORF109	29.4312	0.00339841	0.0295489
C14ORF11	19.1246	0.0855664	0.205181
C14ORF111	34.9423	0.000478316	0.0108903
C14ORF111 /// C14ORF32	26.5888	0.00885133	0.0514644
C14ORF112	23.8455	0.0213474	0.0860994
C14ORF113	24.6622	0.0165072	0.0737739
C14ORF115	30.6178	0.0022522	0.0239243
C14ORF118	13.6489	0.323686	0.476406
C14ORF122	10.3481	0.585447	0.695984
C14ORF124	44.4441	1.28273e-05	0.00221826
C14ORF130	6.72963	0.874952	0.907675
C14ORF131	16.6018	0.165198	0.311178
C14ORF132	7.92338	0.791089	0.847972
C14ORF133	12.6185	0.397369	0.544433
C14ORF135	14.7217	0.25701	0.41259
C14ORF138	17.8149	0.121427	0.255331
C14ORF139	13.8788	0.308518	0.462864
C14ORF140	3.92226	0.984799	0.988057
C14ORF143	16.5578	0.167004	0.313516
C14ORF147	30.3316	0.00248858	0.0250474
C14ORF156	19.8795	0.0694008	0.180672
C14ORF159	21.4437	0.0442488	0.136249
C14ORF161	16.7506	0.159223	0.303566
C14ORF162	14.3382	0.279635	0.435598
C14ORF166	24.3675	0.0181213	0.0781429
C14ORF169	15.6727	0.20669	0.360102
C14ORF172	8.28689	0.762329	0.827313
C14ORF173	15.9583	0.193152	0.343467
C14ORF2	17.7322	0.124068	0.258582
C14ORF32	18.1025	0.112612	0.243512
C14ORF45	12.1993	0.429812	0.571719
C14ORF56	15.6084	0.20984	0.363586
C14ORF58	29.0981	0.00380997	0.0317704
C14ORF65	22.0039	0.0374764	0.122183
C14ORF78	4.66363	0.968281	0.975288
C14ORF79	10.2122	0.597349	0.705294
C14ORF92	22.4982	0.0323008	0.111272
C14ORF93	23.6722	0.0225318	0.0886521
C14ORF94	22.0501	0.0369621	0.121048
C15ORF15	38.4524	0.000129475	0.00637437
C15ORF2	14.7889	0.253185	0.408513
C15ORF24	14.5589	0.266448	0.422203
C15ORF28	22.7005	0.030379	0.107426
C15ORF29	14.6824	0.259268	0.414618
C15ORF31	19.5158	0.0768179	0.192394
C15ORF34	10.9332	0.534655	0.657211
C15ORF38	24.9455	0.0150831	0.0700694
C15ORF39	27.2185	0.00718644	0.0452421
C15ORF44	16.8828	0.154059	0.296988
C15ORF5	19.2228	0.0832915	0.201757
C16ORF24	11.582	0.479807	0.611655
C16ORF28	11.4162	0.49363	0.623616
C16ORF3	7.02749	0.855791	0.894404
C16ORF30	7.2844	0.838261	0.881839
C16ORF33	11.8214	0.460131	0.595448
C16ORF34	7.18156	0.845385	0.887003
C16ORF35	15.7699	0.202004	0.35471
C16ORF42	26.0011	0.0107301	0.0577494
C16ORF44	14.2832	0.282991	0.438673
C16ORF45	7.89693	0.793132	0.849548
C16ORF5	11.9402	0.450498	0.588634
C16ORF51	21.0199	0.0500899	0.147536
C16ORF53	21.5836	0.0424606	0.132734
C16ORF57	13.8733	0.308871	0.463341
C16ORF58	45.7977	7.51772e-06	0.00192545
C16ORF59	19.1137	0.0858214	0.205682
C16ORF61	12.5332	0.403863	0.550168
C16ORF67	9.78758	0.63459	0.734064
C16ORF68	18.5254	0.100644	0.226946
C16ORF7	27.256	0.00709734	0.0451133
C16ORF70	8.79679	0.720182	0.796739
C16ORF72	16.9784	0.15041	0.292532
C16ORF76	22.3387	0.0338948	0.114894
C16ORF80	33.497	0.000809336	0.0142185
C17ORF25	26.1265	0.0103	0.0563156
C17ORF39	11.1845	0.513173	0.639466
C17ORF41	17.965	0.116759	0.249168
C17ORF42	12.1968	0.430008	0.57186
C17ORF48	9.0565	0.698097	0.778461
C17ORF53	11.4237	0.493	0.623115
C17ORF59	19.7971	0.0710234	0.183607
C17ORF60	17.4629	0.132997	0.270289
C17ORF62	32.9984	0.000968592	0.0155504
C17ORF63	31.9674	0.0013999	0.0186775
C17ORF68	25.2512	0.0136763	0.0665426
C17ORF70	15.8466	0.198364	0.350103
C17ORF71	9.25844	0.680712	0.767057
C17ORF73	10.2343	0.595414	0.703984
C17ORF75	19.6998	0.0729822	0.186753
C17ORF80	14.6328	0.262132	0.417895
C17ORF81	14.2604	0.284391	0.440434
C17ORF85	9.65914	0.645836	0.742429
C18ORF1	25.2737	0.0135777	0.0662596
C18ORF10	29.4366	0.00339209	0.0295489
C18ORF22	15.141	0.233814	0.388583
C18ORF24	11.743	0.466533	0.600529
C18ORF25	8.45673	0.748498	0.817156
C18ORF43	21.4663	0.0439554	0.13558
C18ORF8	10.2458	0.594405	0.70325
C19ORF10	16.9879	0.150055	0.291969
C19ORF15	25.0136	0.0147584	0.0693299
C19ORF2	29.7261	0.00307004	0.0279976
C19ORF21	12.4558	0.409802	0.555289
C19ORF22	33.0401	0.000954169	0.0154089
C19ORF24	18.4623	0.102358	0.229406
C19ORF26	11.1445	0.516577	0.642447
C19ORF28	17.3768	0.135966	0.274569
C19ORF29	27.1488	0.00735495	0.0459194
C19ORF36	27.2395	0.00713633	0.0451674
C19ORF4	9.0994	0.694418	0.775855
C19ORF40	13.0102	0.368298	0.517354
C19ORF42	18.8125	0.0931562	0.216318
C19ORF50	12.5449	0.402969	0.549325
C19ORF53	12.9831	0.370272	0.519006
C19ORF54	12.9364	0.373681	0.521621
C19ORF56	20.3823	0.0601903	0.165511
C19ORF57	31.6164	0.00158535	0.0199922
C19ORF58	24.9051	0.0152791	0.0706109
C19ORF6	28.5927	0.00452687	0.0349587
C19ORF7	15.8248	0.199393	0.351347
C1D	38.035	0.000151548	0.00669035
C1GALT1	27.9269	0.00566979	0.0394243
C1GALT1C1	12.902	0.376208	0.523778
C1ORF103	15.0117	0.240798	0.396144
C1ORF105	10.3717	0.583384	0.694777
C1ORF106	16.0422	0.18931	0.339304
C1ORF107	24.8818	0.015393	0.0708185
C1ORF108	12.5188	0.404966	0.551276
C1ORF109	16.7316	0.159975	0.304652
C1ORF112	17.9617	0.116858	0.249339
C1ORF113	14.6034	0.263844	0.419622
C1ORF114	9.16543	0.68874	0.772264
C1ORF115	17.0774	0.14671	0.288023
C1ORF116	12.8439	0.38049	0.527702
C1ORF116 /// LOC653098	8.7263	0.726113	0.800645
C1ORF121	34.7717	0.000509155	0.0112549
C1ORF123	15.9718	0.192532	0.342686
C1ORF129	9.60876	0.650241	0.745859
C1ORF135	15.6772	0.206471	0.360003
C1ORF14	7.3749	0.831877	0.877553
C1ORF144	13.3577	0.343584	0.494554
C1ORF149	7.70561	0.807692	0.860401
C1ORF156	25.2078	0.0138681	0.0670877
C1ORF159	16.188	0.182778	0.331723
C1ORF160	25.9677	0.0108475	0.0580439
C1ORF163	17.8329	0.120859	0.254457
C1ORF164	26.5019	0.00910807	0.0522911
C1ORF165	16.1224	0.185693	0.335343
C1ORF166	16.5171	0.168682	0.315071
C1ORF174	25.905	0.011071	0.0587425
C1ORF175	22.0469	0.0369977	0.121105
C1ORF176	11.5932	0.478876	0.610914
C1ORF181	27.9026	0.00571639	0.0395992
C1ORF183	17.9409	0.117496	0.250062
C1ORF2	14.2003	0.288102	0.443608
C1ORF20	17.0611	0.147312	0.288653
C1ORF21	25.6716	0.0119421	0.0614579
C1ORF24	46.1828	6.45272e-06	0.00179359
C1ORF25	15.8371	0.198811	0.350586
C1ORF27	7.8773	0.794644	0.850757
C1ORF33	9.05297	0.698399	0.77871
C1ORF34	15.8417	0.198594	0.350297
C1ORF35	14.6346	0.262027	0.417778
C1ORF37	17.9262	0.11795	0.250748
C1ORF37 /// LOC653659	16.6914	0.161579	0.30651
C1ORF38	15.9965	0.191397	0.34139
C1ORF41	25.8233	0.011369	0.0594379
C1ORF42	8.87322	0.713719	0.791624
C1ORF46	8.47723	0.746813	0.815851
C1ORF48	22.4899	0.0323824	0.111467
C1ORF50	20.2759	0.0620435	0.168489
C1ORF54	11.9962	0.445987	0.584794
C1ORF56	42.6134	2.62482e-05	0.00296359
C1ORF61	17.1143	0.145347	0.286358
C1ORF63	32.3156	0.00123675	0.0174242
C1ORF66	28.6601	0.0044242	0.0346814
C1ORF68	16.3708	0.174838	0.322864
C1ORF69	17.4651	0.132924	0.270265
C1ORF75	15.6544	0.20758	0.361275
C1ORF76	29.8286	0.00296318	0.0275696
C1ORF77	23.3377	0.0249923	0.0947026
C1ORF78	19.5855	0.0753445	0.189848
C1ORF80	15.0602	0.238159	0.393257
C1ORF82	12.3211	0.420245	0.563395
C1ORF89	28.6412	0.00445278	0.0347324
C1ORF9	25.0579	0.014551	0.0688681
C1ORF95	7.16529	0.8465	0.887823
C1QA	5.95802	0.918183	0.938225
C1QB	21.5957	0.0423092	0.132421
C1QBP	17.8022	0.12183	0.255816
C1QDC1	33.38	0.000844238	0.0144992
C1QL1	15.3553	0.222577	0.376903
C1QTNF1	22.7141	0.0302536	0.107181
C1QTNF3	16.7321	0.159955	0.304652
C1R /// LOC643676	12.1086	0.436997	0.577704
C1RL	12.6892	0.392032	0.53917
C1S	25.0323	0.0146707	0.0692137
C2	23.3512	0.0248884	0.0945236
C20ORF10	16.3209	0.176974	0.325224
C20ORF103	19.315	0.0812057	0.198584
C20ORF11	13.1368	0.359173	0.50864
C20ORF111	34.8468	0.00049535	0.0111174
C20ORF116	7.07476	0.852634	0.892503
C20ORF117	16.9423	0.151781	0.294083
C20ORF12	13.1562	0.357787	0.507667
C20ORF121	12.3974	0.414318	0.558761
C20ORF149	33.0373	0.000955115	0.0154089
C20ORF172	15.9149	0.195163	0.346351
C20ORF19	39.5023	8.6943e-05	0.00522519
C20ORF195	23.8032	0.0216314	0.0866946
C20ORF20	25.1632	0.0140684	0.0678047
C20ORF23	10.2992	0.589726	0.699638
C20ORF24	12.7908	0.384429	0.531452
C20ORF27	34.6957	0.000523503	0.0114478
C20ORF28	5.13938	0.953161	0.964657
C20ORF29	16.2591	0.179653	0.327943
C20ORF3	12.0146	0.444511	0.583739
C20ORF30	29.7936	0.00299927	0.0277698
C20ORF32	13.1152	0.36072	0.510125
C20ORF38	10.6442	0.559628	0.676319
C20ORF39	6.74073	0.874261	0.907216
C20ORF4	11.8244	0.459883	0.595448
C20ORF42	19.9515	0.0680084	0.1783
C20ORF43	13.6656	0.322569	0.475444
C20ORF44	8.13491	0.774501	0.836373
C20ORF45	32.1342	0.00131929	0.0180533
C20ORF46	10.967	0.531751	0.654524
C20ORF59	13.8284	0.311798	0.46569
C20ORF6	12.3278	0.419727	0.56304
C20ORF67	22.6566	0.0307873	0.108375
C20ORF91 /// RP13-401N8.2	14.3786	0.277185	0.432892
C21ORF108	18.2761	0.107559	0.23681
C21ORF2	15.2567	0.227698	0.382227
C21ORF25	17.8787	0.119422	0.252488
C21ORF33	9.52959	0.657153	0.750663
C21ORF45	19.0292	0.0878268	0.2088
C21ORF55	10.4953	0.572592	0.686946
C21ORF59	36.1767	0.000303473	0.00913982
C21ORF6	28.2007	0.00516997	0.0372853
C21ORF62	12.3057	0.421448	0.564007
C21ORF66	27.8633	0.00579242	0.039898
C21ORF7	12.9042	0.376044	0.523604
C21ORF77	16.8864	0.153921	0.296851
C21ORF91	8.00942	0.784394	0.843218
C21ORF96	14.0142	0.2998	0.45521
C22ORF24	27.7628	0.0059914	0.0407635
C22ORF26	11.1278	0.518003	0.64362
C22ORF28	31.1265	0.00188434	0.0218974
C22ORF29	26.0996	0.010391	0.0565634
C22ORF31	10.3486	0.585408	0.695984
C22ORF5	4.95509	0.959462	0.969563
C22ORF9	16.4036	0.17344	0.320903
C2ORF10	12.5822	0.400127	0.546753
C2ORF17	32.4187	0.00119209	0.017117
C2ORF18	15.774	0.201806	0.354462
C2ORF24	37.4913	0.000185894	0.007189
C2ORF25	9.40312	0.668167	0.758761
C2ORF27	16.8647	0.154757	0.297946
C2ORF28	23.3408	0.0249683	0.0946652
C2ORF3	21.3621	0.0453233	0.138186
C2ORF31	15.5187	0.214285	0.36819
C2ORF33	10.1564	0.602239	0.709005
C2ORF34	15.4857	0.215944	0.369659
C2ORF37	19.696	0.0730601	0.186865
C2ORF4	13.5904	0.327627	0.479772
C2ORF42	24.2097	0.0190454	0.0803475
C2ORF43	12.4458	0.410574	0.55579
C2ORF44	14.8543	0.2495	0.404819
C2ORF47	13.7137	0.319363	0.472679
C2ORF49	12.59	0.399533	0.54627
C3 /// LOC653879	19.9527	0.0679856	0.178275
C3AR1	19.7371	0.0722254	0.185706
C3ORF14	10.0258	0.613701	0.717805
C3ORF18	24.1099	0.0196518	0.0817863
C3ORF27	20.338	0.0609559	0.166723
C3ORF28	25.0238	0.0147104	0.0693031
C3ORF29	33.6587	0.000763362	0.0138005
C3ORF32	15.471	0.216685	0.370405
C3ORF36	18.2605	0.108006	0.237428
C3ORF37	11.0346	0.525955	0.650171
C3ORF40	21.5485	0.0429033	0.133711
C3ORF51	6.67085	0.878577	0.910303
C3ORF52	6.09867	0.911027	0.933414
C3ORF60	16.5585	0.166973	0.313503
C3ORF63	6.03959	0.914073	0.935601
C3ORF64	28.3249	0.00495731	0.036405
C3ORF9	29.362	0.0034802	0.029918
C4A /// C4B	29.5132	0.00330384	0.0291616
C4BPA	17.0893	0.146269	0.287496
C4BPB	16.9933	0.149851	0.291657
C4ORF10	11.7249	0.468015	0.601851
C4ORF15	35.9522	0.000329777	0.00933946
C4ORF16	8.12621	0.775191	0.836712
C4ORF18	14.3713	0.277627	0.433272
C4ORF19	6.02179	0.91498	0.936242
C4ORF20	28.1936	0.00518233	0.037334
C4ORF23	11.8532	0.457541	0.593882
C4ORF27	9.28194	0.678679	0.76609
C4ORF29	10.7303	0.552163	0.670516
C4ORF30	21.8995	0.0386621	0.124753
C4ORF31	30.7845	0.00212466	0.0233124
C4ORF6	8.74133	0.724851	0.79965
C4ORF8	16.0698	0.188058	0.337863
C4ORF9	6.10088	0.910911	0.933414
C5	9.58115	0.652653	0.747648
C5AR1	30.875	0.00205832	0.0228661
C5ORF13	7.2932	0.837645	0.881775
C5ORF14	17.203	0.142119	0.282544
C5ORF15	22.5674	0.0316315	0.110115
C5ORF21	15.4812	0.216172	0.369907
C5ORF22	23.2299	0.0258365	0.0969105
C5ORF23	19.8685	0.0696141	0.181016
C5ORF28	28.3789	0.00486743	0.0360785
C5ORF3	12.6625	0.39404	0.541262
C5ORF4	12.4939	0.406871	0.552911
C5ORF5	32.4837	0.0011647	0.016946
C6	38.0282	0.00015194	0.00669035
C6ORF10	12.7694	0.386026	0.532997
C6ORF103	7.19261	0.844627	0.886416
C6ORF105	20.7285	0.0544999	0.155238
C6ORF106	14.0256	0.299074	0.454418
C6ORF108	32.7701	0.00105126	0.0160179
C6ORF111	36.5151	0.000267642	0.00879526
C6ORF12	21.2323	0.047081	0.141824
C6ORF120	13.671	0.322208	0.475279
C6ORF123	18.8547	0.0920959	0.21507
C6ORF130	25.8576	0.0112428	0.0589668
C6ORF134	23.7552	0.0219575	0.0875743
C6ORF137	8.45894	0.748317	0.817156
C6ORF145	8.40527	0.752713	0.819945
C6ORF148	15.1767	0.231913	0.387063
C6ORF15	12.1691	0.432195	0.573749
C6ORF155	11.0443	0.525126	0.649436
C6ORF162	21.1379	0.0483966	0.144196
C6ORF166	10.4606	0.575619	0.689523
C6ORF208	15.2874	0.226095	0.380494
C6ORF211	42.2561	3.01568e-05	0.00311901
C6ORF25	9.01934	0.701277	0.781005
C6ORF27	9.70578	0.641754	0.739828
C6ORF32	30.7877	0.00212228	0.0233124
C6ORF35 /// LOC653041	23.3192	0.0251348	0.095065
C6ORF47	8.64072	0.733273	0.806539
C6ORF48	32.2961	0.00124537	0.0175086
C6ORF49	28.4864	0.00469322	0.0356183
C6ORF54	14.0604	0.296869	0.452666
C6ORF60	8.77667	0.721879	0.797878
C6ORF61	27.3788	0.00681279	0.0439176
C6ORF62	36.1954	0.000301373	0.0090971
C6ORF64	19.9003	0.0689962	0.17997
C6ORF66	27.4566	0.006638	0.0433501
C6ORF75	25.8415	0.0113018	0.0592024
C6ORF79	4.66139	0.968344	0.975288
C6ORF96	19.3579	0.0802501	0.197254
C6ORF97	21.0189	0.0501047	0.147539
C7	26.198	0.0100622	0.055636
C7ORF10	15.4418	0.21816	0.371926
C7ORF16	14.9037	0.246743	0.402205
C7ORF23	19.5731	0.075604	0.190258
C7ORF24	22.9299	0.0283271	0.102673
C7ORF25	17.3362	0.137383	0.276431
C7ORF26	30.0385	0.00275536	0.0264285
C7ORF28A	10.8857	0.538736	0.660156
C7ORF28A /// C7ORF28B	17.7183	0.124514	0.259249
C7ORF28A /// C7ORF28B /// LOC647357 /// LOC652200	12.6036	0.398498	0.545421
C7ORF42	16.3949	0.173812	0.321369
C7ORF43	17.8567	0.120112	0.253404
C7ORF44	31.2447	0.0018076	0.0215318
C7ORF49	15.6278	0.208883	0.362661
C8A	15.2999	0.225445	0.379639
C8B	22.8291	0.029212	0.104775
C8G	15.6271	0.20892	0.362661
C8ORF17	15.7069	0.205032	0.358337
C8ORF30A	32.8408	0.00102496	0.0158642
C8ORF32	17.84	0.120635	0.254182
C8ORF33	15.6394	0.208315	0.361975
C8ORF39	18.082	0.113224	0.2444
C8ORF4	11.3977	0.495177	0.62486
C8ORF41	15.329	0.223935	0.378148
C8ORF44	5.23373	0.949713	0.962629
C8ORF51	16.4385	0.171968	0.318976
C8ORF55	25.666	0.0119638	0.0614579
C8ORF59	13.3759	0.34232	0.493342
C8ORF60	13.2463	0.351396	0.501801
C8ORF70	11.4302	0.492456	0.622722
C8ORF71	8.19194	0.769956	0.833088
C8ORF72	19.2596	0.0824524	0.200415
C9	8.21665	0.767979	0.831821
C9ORF106	9.9663	0.618917	0.721598
C9ORF114	7.47065	0.82501	0.872763
C9ORF116	23.8407	0.02138	0.0861387
C9ORF127	23.754	0.0219656	0.0875743
C9ORF150	11.8994	0.453791	0.591373
C9ORF156	13.4121	0.339811	0.490866
C9ORF16	31.4768	0.00166556	0.0204622
C9ORF26	16.4973	0.169505	0.316099
C9ORF27	27.9889	0.00555277	0.0389307
C9ORF3	9.29088	0.677905	0.765713
C9ORF31	5.68246	0.931236	0.948729
C9ORF33	2.81327	0.996725	0.997173
C9ORF36	12.3048	0.421518	0.564007
C9ORF38	11.6971	0.470302	0.603924
C9ORF39	12.7805	0.385191	0.532176
C9ORF40	12.0192	0.444142	0.583451
C9ORF45	11.0076	0.528264	0.652001
C9ORF46	15.3339	0.22368	0.377918
C9ORF5	6.37373	0.896084	0.923066
C9ORF53	20.515	0.0579504	0.161617
C9ORF6	7.50457	0.822551	0.871059
C9ORF61	15.67	0.206822	0.360143
C9ORF68	18.1495	0.111225	0.241592
C9ORF7	23.1844	0.0262009	0.0979195
C9ORF74	16.2732	0.179043	0.327329
C9ORF77	19.3913	0.0795131	0.196093
C9ORF78	9.90573	0.62423	0.725162
C9ORF82	17.2257	0.141303	0.281508
C9ORF86	18.8834	0.0913812	0.214009
C9ORF9	12.4505	0.410211	0.555486
C9ORF91	13.5084	0.333194	0.485017
C9ORF95	24.0528	0.020007	0.0826576
C9ORF97	15.0352	0.239516	0.39457
CA1	8.81407	0.718724	0.795466
CA10	17.4689	0.132795	0.270248
CA11	8.95446	0.706815	0.785664
CA12	33.8015	0.000724895	0.0136411
CA14	12.8821	0.377671	0.525267
CA2	10.0065	0.61539	0.719039
CA3	21.4867	0.043692	0.135033
CA4	20.4331	0.0593236	0.164075
CA5A	16.9003	0.153387	0.296291
CA5B	21.3317	0.0457291	0.139011
CA5BL	14.7093	0.257721	0.413183
CA6	18.8208	0.0929456	0.216117
CA7	20.4942	0.0582958	0.162369
CA8	12.5537	0.402299	0.548821
CA9	18.6916	0.0962478	0.220574
CAB39	14.5286	0.268234	0.424042
CAB39L	10.1212	0.605326	0.711503
CABC1	24.4489	0.0176613	0.0767797
CABIN1	36.3123	0.000288584	0.00897502
CABP1	22.8067	0.0294126	0.105236
CABP2	17.4105	0.134796	0.272864
CABP3 /// CABP5	14.6919	0.258721	0.41414
CABYR	5.30113	0.947157	0.960915
CACNA1A	34.9069	0.000484566	0.010995
CACNA1B	11.339	0.50011	0.628884
CACNA1C	14.8559	0.24941	0.404759
CACNA1D	22.2888	0.0344081	0.116074
CACNA1E	17.1673	0.143413	0.283806
CACNA1F	10.5804	0.565177	0.68062
CACNA1G	13.6613	0.322856	0.475625
CACNA1H	20.4161	0.0596136	0.164638
CACNA1I	18.15	0.11121	0.241592
CACNA1S	14.3735	0.277498	0.433178
CACNA2D1	23.1581	0.0264129	0.0986268
CACNA2D2	6.94971	0.860919	0.897654
CACNA2D3	26.2826	0.00978744	0.0546148
CACNB1	16.3471	0.175849	0.323969
CACNB2	8.96671	0.705771	0.7847
CACNB3	13.0025	0.368857	0.517697
CACNB4	12.8904	0.377059	0.524635
CACNG1	14.3539	0.278681	0.434568
CACNG2	26.7718	0.00833307	0.0497449
CACNG3	13.9349	0.304888	0.459692
CACNG4	27.3996	0.00676552	0.0438301
CACNG5	11.357	0.4986	0.627755
CACYBP	21.5795	0.0425125	0.13283
CAD	20.226	0.0629291	0.169743
CADPS	17.8707	0.119672	0.252921
CADPS2	17.9831	0.116204	0.248391
CALB1	10.9004	0.537475	0.659336
CALB2	9.37871	0.670289	0.760102
CALCA	22.3224	0.0340618	0.115314
CALCB	10.0428	0.61221	0.716919
CALCOCO1	18.6533	0.0972469	0.221752
CALCOCO2	19.4272	0.078728	0.194986
CALCR	27.5649	0.00640211	0.042496
CALCRL	20.2205	0.0630283	0.169918
CALD1	9.13361	0.691478	0.773531
CALM1	31.6763	0.00155211	0.0197931
CALM2	12.259	0.425106	0.567517
CALM3	36.8505	0.00023622	0.0082504
CALML3	13.4911	0.334381	0.486297
CALML4	7.39517	0.830433	0.876415
CALML5	19.0644	0.0869856	0.207669
CALR	26.4868	0.0091534	0.052387
CALU	15.1183	0.235033	0.389613
CAMK1	13.6836	0.321369	0.474509
CAMK1D	22.3597	0.0336804	0.114429
CAMK1G	24.5995	0.0168391	0.0744917
CAMK2A	7.35705	0.833145	0.878668
CAMK2B	14.2646	0.284132	0.440085
CAMK2D	15.6715	0.206751	0.360104
CAMK2G	14.5942	0.264381	0.420175
CAMK2N1	13.4449	0.337546	0.489197
CAMK4	16.1034	0.186548	0.336297
CAMKK2	13.8253	0.312004	0.465842
CAMKV	27.269	0.00706662	0.0449551
CAMLG	23.6177	0.0229165	0.0898478
CAMP	19.8696	0.0695933	0.181016
CAMSAP1	24.068	0.0199121	0.0823774
CAMSAP1L1	12.8796	0.377852	0.525355
CAMTA1	18.6475	0.0973981	0.221907
CAMTA2	6.65676	0.879438	0.911054
CAND1	22.5906	0.0314093	0.109819
CAND2	15.9771	0.192286	0.342475
CANT1	15.8591	0.197775	0.349426
CANX	22.0209	0.0372864	0.121692
CAP1	42.405	2.8463e-05	0.00308742
CAP2	14.8592	0.249227	0.404672
CAPG	8.44579	0.749395	0.817734
CAPN1	24.6995	0.0163131	0.0733432
CAPN10	12.5489	0.402663	0.549244
CAPN11	14.5715	0.26571	0.421535
CAPN2	18.5446	0.100126	0.226153
CAPN3	29.3996	0.00343554	0.0296872
CAPN5	13.6339	0.324697	0.477156
CAPN6	14.6691	0.260035	0.415545
CAPN7	25.9885	0.0107741	0.0579065
CAPN9	15.0857	0.236781	0.391612
CAPNS1	34.2924	0.000606512	0.0124685
CAPZA1	32.9886	0.000971978	0.0155504
CAPZA2	27.1243	0.00741505	0.0462082
CAPZB	23.037	0.0274131	0.100779
CARD10	14.8323	0.250735	0.406052
CARD14	11.4438	0.491312	0.622091
CARD15	22.2255	0.0350685	0.117176
CARD4	33.0484	0.000951311	0.0154034
CARD8	28.3078	0.00498603	0.0365515
CARD9	18.7761	0.0940766	0.217798
CARF	26.2479	0.00989916	0.0549853
CARHSP1	17.1404	0.144393	0.285068
CARKL	9.22517	0.683587	0.768468
CARM1	26.2728	0.00981908	0.0546688
CARS	17.9461	0.117338	0.249804
CART1	15.0796	0.237111	0.392013
CARTPT	14.4257	0.274353	0.43008
CASC1	6.26209	0.902298	0.926962
CASC3	29.7284	0.00306757	0.0279942
CASC5	5.97519	0.917328	0.937638
CASD1	16.2727	0.179061	0.327329
CASK	9.59501	0.651442	0.746824
CASKIN2	15.5605	0.212205	0.365935
CASP1	33.998	0.000675022	0.0131718
CASP10	27.2706	0.0070628	0.0449551
CASP2	36.2222	0.000298391	0.00906864
CASP3	21.8322	0.0394445	0.126537
CASP4	36.3654	0.000282953	0.00892719
CASP5	13.8883	0.307895	0.462034
CASP6	9.5904	0.651845	0.747109
CASP7	30.6911	0.00219526	0.0235929
CASP8	13.3241	0.345928	0.496623
CASP8AP2	19.5957	0.0751301	0.189715
CASP9	6.52398	0.887404	0.916673
CASQ1	15.4623	0.217123	0.370738
CASQ2	18.4039	0.103967	0.23235
CASR	18.881	0.0914412	0.214026
CAST	12.4214	0.412458	0.557374
CASZ1	10.886	0.538713	0.660156
CAT	19.0742	0.0867535	0.207357
CATR1	10.3364	0.586471	0.696767
CATSPER2 /// LOC440278	14.1073	0.293908	0.44968
CAV1	11.1359	0.517305	0.643173
CAV2	25.1994	0.0139059	0.0672219
CAV3	17.7817	0.122481	0.256578
CBARA1	20.0412	0.0663108	0.175739
CBFA2T2	10.7766	0.548158	0.667481
CBFA2T3	9.32709	0.674768	0.763032
CBFB	19.4238	0.0788017	0.194994
CBL	17.8093	0.121603	0.255461
CBLB	21.8715	0.0389859	0.125565
CBLC	10.9664	0.531804	0.654524
CBLL1	24.1117	0.0196407	0.0817863
CBLN1	13.1873	0.355576	0.50574
CBR1	36.6832	0.000251413	0.00853523
CBR3	25.592	0.0122538	0.0622107
CBR4	31.1965	0.00183853	0.0217076
CBS	16.1845	0.182933	0.331874
CBWD1 /// CBWD2 /// CBWD5 /// RP11-561O23.4 /// CBWD3 /// CBWD6 /// LOC653165	21.6377	0.0417863	0.131272
CBX1	21.8086	0.0397216	0.126938
CBX2	18.0666	0.113683	0.244994
CBX3 /// LOC653972	24.673	0.0164505	0.0736519
CBX4	28.9585	0.00399631	0.0327712
CBX5	20.6099	0.0563934	0.158701
CBX6	32.8416	0.00102464	0.0158642
CBX7	17.9179	0.118207	0.250956
CBX8	12.2389	0.426689	0.56872
CC2D1A	14.1737	0.289755	0.445382
CCBL1	23.2177	0.0259335	0.0972195
CCBP2	25.1491	0.0141318	0.0679937
CCDC101	19.2281	0.0831709	0.201611
CCDC102B	13.3246	0.345893	0.496623
CCDC106	6.24798	0.903069	0.927397
CCDC109B	27.7583	0.00600035	0.0408036
CCDC121	19.102	0.0860976	0.20601
CCDC130	24.2281	0.0189356	0.0800503
CCDC131	33.7649	0.000734572	0.0136752
CCDC132	17.9096	0.118464	0.251249
CCDC14	19.2085	0.0836186	0.201925
CCDC15	28.1046	0.00534035	0.0379987
CCDC19	18.7145	0.0956554	0.220002
CCDC21	15.0222	0.240226	0.395349
CCDC22	18.2169	0.109261	0.239007
CCDC25	26.028	0.0106366	0.057385
CCDC28A	18.7583	0.0945307	0.218476
CCDC28B	11.4271	0.492715	0.622873
CCDC33	15.4465	0.217922	0.371679
CCDC40	15.6853	0.206079	0.359606
CCDC41	21.4626	0.0440028	0.13568
CCDC44	10.8489	0.54191	0.662771
CCDC46	11.0731	0.522663	0.647721
CCDC47	32.6185	0.00110991	0.0165827
CCDC48	29.5872	0.0032207	0.0287045
CCDC49	35.1484	0.000443488	0.0104974
CCDC51	37.6017	0.000178355	0.00714082
CCDC52	9.74236	0.638552	0.737114
CCDC53	22.5182	0.0321064	0.110946
CCDC56	30.4438	0.00239318	0.0245267
CCDC57	21.0091	0.0502479	0.147862
CCDC59	25.8574	0.0112436	0.0589668
CCDC6	17.4508	0.133412	0.270925
CCDC64	7.82416	0.798716	0.854158
CCDC68	11.5227	0.484733	0.615817
CCDC69	7.00595	0.85722	0.895318
CCDC70	16.7061	0.160991	0.305805
CCDC71	11.7317	0.467461	0.601433
CCDC72	21.7133	0.040862	0.12922
CCDC76	24.7341	0.0161346	0.0728487
CCDC81	7.09456	0.851302	0.891297
CCDC85B	23.1128	0.0267834	0.0994002
CCDC86	16.8376	0.155809	0.299151
CCDC87	15.6386	0.208355	0.361975
CCDC9	26.9772	0.00778585	0.0475373
CCDC91	21.3306	0.0457441	0.139024
CCDC92	24.328	0.0183485	0.0786146
CCDC93	28.6403	0.00445414	0.0347324
CCDC94	17.4029	0.13506	0.273233
CCDC99	17.4752	0.132579	0.269932
CCHCR1	16.8147	0.156703	0.300435
CCIN	16.0151	0.190546	0.34074
CCK	11.5648	0.481236	0.612768
CCKAR	26.0053	0.0107155	0.0577175
CCKBR	5.96607	0.917783	0.937913
CCL1	26.5666	0.00891646	0.0515735
CCL11	27.2396	0.00713603	0.0451674
CCL13	20.8652	0.0523901	0.15146
CCL14 /// CCL15	18.6392	0.0976164	0.22229
CCL16	17.4162	0.134602	0.272553
CCL17	9.253	0.681182	0.767207
CCL18	13.0108	0.368255	0.517348
CCL19	9.51034	0.658832	0.751808
CCL2	19.4895	0.077381	0.193289
CCL20	22.3091	0.0341982	0.115597
CCL21	15.3457	0.223073	0.377552
CCL22	17.4179	0.134543	0.272477
CCL23	9.70562	0.641769	0.739828
CCL24	20.1013	0.0651942	0.173537
CCL25	19.0144	0.0881812	0.209344
CCL27	13.4922	0.334301	0.486236
CCL3 /// CCL3L1 /// CCL3L3 /// LOC643930	15.1022	0.235892	0.390529
CCL4	10.3714	0.583415	0.694777
CCL5	13.9093	0.306536	0.461031
CCL7	7.39921	0.830145	0.876318
CCL8	18.9078	0.0907768	0.213115
CCNA1	11.3252	0.501277	0.629688
CCNA2	19.0465	0.0874123	0.208126
CCNB1	7.6376	0.812771	0.864201
CCNB1IP1	29.7845	0.00300872	0.0278186
CCNB2	19.6257	0.0745052	0.189019
CCNC	38.1339	0.00014601	0.00660714
CCND1	28.1779	0.00520987	0.0374387
CCND2	16.3548	0.17552	0.323631
CCND3	29.8345	0.0029571	0.0275696
CCNE1	38.2032	0.000142246	0.00655946
CCNE2	16.8435	0.15558	0.298825
CCNF	41.461	4.10246e-05	0.00352837
CCNG1	19.7275	0.0724192	0.185954
CCNG2	27.0322	0.00764509	0.0470483
CCNH	12.9421	0.373265	0.521416
CCNI	27.4877	0.0065695	0.0430714
CCNJ	10.5651	0.56651	0.681488
CCNJL	31.9488	0.00140917	0.0187636
CCNK	21.0212	0.0500703	0.147536
CCNL1	28.0234	0.00548867	0.038603
CCNL2 /// LOC643556	20.5257	0.0577721	0.161322
CCNT1	14.3523	0.278781	0.434623
CCNT2	37.8674	0.000161414	0.00690252
CCPG1	19.3237	0.0810104	0.198335
CCR1	35.4423	0.000398057	0.0101353
CCR10	10.9539	0.532871	0.655683
CCR2	20.2839	0.0619027	0.168209
CCR2 /// LOC653518	9.58692	0.652149	0.747216
CCR3	29.3372	0.00351001	0.0300968
CCR4	10.1651	0.601476	0.708424
CCR5 /// LOC653725	21.4582	0.0440604	0.135763
CCR6	18.2233	0.109076	0.23873
CCR7	16.248	0.18014	0.328607
CCR8	12.811	0.382924	0.530087
CCR9	5.08029	0.955243	0.966105
CCRK	9.28614	0.678316	0.765983
CCRL1	9.14763	0.690272	0.772813
CCRL2 /// LOC642312	26.3719	0.00950534	0.0536919
CCRN4L	30.8664	0.00206451	0.0229157
CCS	11.1386	0.517082	0.643015
CCT2	43.914	1.57953e-05	0.00247508
CCT3	14.4352	0.273784	0.429436
CCT4	23.975	0.0205009	0.0839459
CCT5	25.3911	0.0130745	0.0646381
CCT6A	37.1047	0.000214838	0.00795424
CCT6B	24.4792	0.0174932	0.0763226
CCT7	30.3027	0.00251379	0.0252045
CCT8	14.8834	0.247876	0.403264
CD14	17.6159	0.127859	0.263581
CD151	16.9892	0.150003	0.29191
CD160	19.0386	0.0876023	0.208378
CD163	19.3543	0.0803303	0.197306
CD164	26.0423	0.0105869	0.0573027
CD177	20.6592	0.0555994	0.157236
CD180	17.6399	0.127069	0.262511
CD19	24.7773	0.0159144	0.0723933
CD1A	23.3273	0.0250725	0.0949254
CD1B	29.0633	0.00385558	0.0320294
CD1C	44.8242	1.10447e-05	0.00219831
[truncated: 11,344 more rows]
